1

2 Embryotoxic and teratogenic effects of polyethylene microbeads found in facial wash products

3 in Zebrafish (*Danio rerio*) using the Fish Embryo Acute Toxicity Test

4

5 Margaret C. De Guzman, MSc <sup>1¶</sup>, Patricia Anne P. Chua <sup>2¶</sup>, Franceska S. Sedano <sup>3¶</sup>

6

7

8 <sup>1</sup>Department of Biology, College of Arts and Sciences, University of the Philippines – Manila,

9 Padre Faura, Manila, Philippines

10

11 <sup>2</sup>Department of Biology, College of Arts and Sciences, University of the Philippines – Manila,

12 Padre Faura, Manila, Philippines

13

14 <sup>3</sup>Department of Biology, College of Arts and Sciences, University of the Philippines – Manila,

15 Padre Faura, Manila, Philippines

16

17 \*Corresponding Author

18 Email: [mcdeguzman4@up.edu.ph](mailto:mcdeguzman4@up.edu.ph) (MCDG)

19 Email: [papchua@up.edu.ph](mailto:papchua@up.edu.ph) (PAPC)

20 Email: [fssedano@up.edu.ph](mailto:fssedano@up.edu.ph) (FSS)

21

22

23 ¶ These authors contributed equally to this work.

## 24 **Abstract**

25           Use of polyethylene beads in facial cleansers has been continuously questioned by  
26 scientific communities for they adversely affect aquatic organisms once these beads find their way  
27 into their habitats. This study specifically aims to determine *Danio rerio* mortality rate using lethal  
28 endpoints and to evaluate sublethal teratogenic effects in *Danio rerio* due to polyethylene  
29 microbead exposure. *Danio rerio*, a model organism for ecotoxicology, was subjected to the Fish  
30 Embryo Acute Toxicity Test. Embryos were exposed to polyethylene microbead suspensions (PE-  
31 MBS) of varying concentrations (i.e., 20 µg/L, 200 µg/L, 2000 µg/L). They were also exposed to  
32 5% ethanol (positive control), reconstituted water (negative control), 0.01% Tween 80 (emulsifier  
33 control), and 1% DMSO (solvent control). Toxicological endpoints (i.e., egg coagulation, lack of  
34 somite formation, non-detachment of tail, and lack of heartbeat) were observed every 24 hours  
35 until the 96th hour exposure. Hatching was observed from 48 hpf while teratogenicity was  
36 observed at 144 hpf. Significant differences between means and variances were observed for all  
37 treatment groups in relation to the negative control. For all groups, 0.01% Tween 80, 1% DMSO  
38 and 20 µg/L PE-MBS did not significantly differ with the negative control due to negligible  
39 concentration but 5% ethanol and higher concentrations of PE-MBS did. This indicated that high  
40 concentrations of PE-MBS exposure may induce early hatching, mortality, increased  
41 malformation, and increased heart rate. Tukey Kramer *post hoc* Test substantiated that PE-MBS  
42 toxicity is dose dependent since embryotoxicity and teratogenicity increases at higher  
43 concentrations. LC<sub>50</sub> obtained using probit analysis based on experimental data was 2455.096  
44 µg/L, and was higher than the concentrations used in this study. Further studies should be  
45 conducted to know more about the adverse effects of polyethylene microbeads to the biota.  
46 **Keywords:** embryotoxicity, teratogenicity, polyethylene microbeads, zebrafish

47 **Author Summary**

48           Margaret De Guzman, MSc, Patricia Chua, and Franceska Sedano have all  
49 equally contributed to this work in conceptualization, formal analysis, funding  
50 acquisition, and investigation. All authors have also equally headed project  
51 administration, procurement of resources and writing.

52

53

54

55

56

57

58

59

60

61

62

63

64

65

## 66 **Introduction**

### 67 **Background of the Study**

68 Marine pollution caused by plastic microbeads has been an emerging concern for the  
69 embryonic development and cellular health of many organisms [1]. Polyethylene microbeads (PE-  
70 MB) are polysynthetic resins found in beauty products and generally serve as abrasives or bulking  
71 agents in cleaning products and exfoliants in numerous beauty products [2]. Due to their minuscule  
72 size, most sewage treatment plants are unable to effectively filter these microbeads. As a result,  
73 these microplastics infiltrate the aquatic ecosystem and pose adverse effects to its constituents.  
74 Since microbeads are usually treated with additives and plasticizers during the production process  
75 [3], and have the ability to adsorb chemical pollutants [4], exposure to these microbeads may result  
76 in developmental toxicity in aquatic organisms [5].

77 Substances that may cause physical or functional defects in a developing embryo are  
78 considered to be teratogenic [6]. Polyethylene, the most common type of plastic used for  
79 microbeads [7], is a polymer of repeating CH<sub>2</sub> units [8]; however, this polymer degrades for a long  
80 period of time [9], rendering them to be highly persistent and toxic to the environment. The  
81 chemical composition and ability of polyethylene to be carriers of toxins from industrial  
82 manufacturers makes it a potential teratogen to living organisms [10]. Once these microbeads  
83 come in contact with low trophic organisms such as fish larvae, exposure to toxic additives  
84 contained in polyethylene microbeads may interfere with metabolic pathways, alter gene integrity,  
85 and consequently lead to embryotoxicity and formation of teratogenic abnormalities [5,11].

86 Currently, there are no known studies conducted regarding the quantity of polyethylene  
87 microbeads in Philippine waters as well as the harmful effects that they pose. This study differs  
88 from others as this study is limited to polyethylene among other microplastics such as

89 polypropylene, polyester, polyethylene terephthalate, and nylon. This study will also use  
90 polyethylene microbeads with sizes based on the ones contained in facial cleansers being  
91 commercially sold in the Philippines. This study will also be done *in vitro* instead of obtaining  
92 polyethylene bead samples from the marine or freshwater environment.

93 *Danio rerio* is the chosen test organism of the study. *Danio rerio* is a tropical freshwater  
94 fish and is readily available, inexpensive, exhibits high fecundity [12] and rapid development [13].  
95 Its genes are also likened to 70% of genes in humans [14]. Furthermore, transparency of *Danio*  
96 *rerio* embryos allows researchers to observe teratogenesis in the embryonic development of the  
97 zebrafish [13]. In this study, *Danio rerio* were subjected to the Fish Embryo Acute Toxicity Test  
98 [15]. The Fish Embryo Acute Toxicity Test is used to evaluate the toxicity of certain chemicals  
99 on the embryonic development of vertebrates [16] and exposes fertilized eggs to varying  
100 concentrations of the toxin for 96 hours [17].

101

## 102 **Statement of the Problem**

103 Do polyethylene microbeads induce embryotoxic and teratogenic effects on *Danio rerio*  
104 embryos?

105

## 106 **Research Objectives**

107 The main objective of this study is to assess if polyethylene microbeads can induce  
108 teratogenic and embryotoxic effects in *Danio rerio*. The study specifically aims to:

- 109 1.) to determine the mortality rate of *Danio rerio* using lethal endpoints such as lack of  
110 heartbeat, coagulation of fertilized eggs, lack of somite formation, and lack of  
111 detachment of tail-bud from yolk sac

- 112           2.) to determine the lethal concentration (LC<sub>50</sub>) or the minimum concentration that is lethal  
113           to 50% of the exposed population, and;  
114           3.) to evaluate the sublethal teratogenic effects of polyethylene microbead exposure such  
115           as yolk sac and pericardial edema, bent tail and spine axes, and deflated swim bladder.

116

### 117 **Significance of the Study**

118           This study is deemed significant as it provides information on the deleterious  
119 effects of polyethylene microbeads found in facial cleansers on the developing embryo of  
120 freshwater organisms such as *Danio rerio*. In addition, this study is timely and relevant since there  
121 has been an observed increase of microplastics in marine and freshwater environments [18],  
122 resulting in biomagnification and bioaccumulation [19]. Due to this occurrence, the Microbead-  
123 Free Waters Act has been observed in Canada, America, and the United Kingdom. According to  
124 Romero [20], this act may also be passed by Senator Loren Legarda in the Philippines soon, a  
125 country known to be third in the list of countries with the most ocean plastic pollution in a 2015  
126 study conducted by the University of Georgia. Additionally, data gathered from this study may  
127 prompt institutions to take action in protecting bodies of water from plastic pollution and  
128 encourage local as well as international skincare manufacturers to produce a more environmentally  
129 friendly exfoliant alternative to polyethylene microbeads.

130

131

### 132 **Scope and Limitations**

133           This study is primarily focused on the assessment of teratogenic and embryotoxic effects  
134 of virgin polyethylene microbeads in *Danio rerio*. The size of polyethylene microbeads used in

135 the study is based on the size of commercially sold facial cleansers that contain polyethylene  
136 microbeads in the Philippines. Embryotoxic and teratogenic effects induced by polyethylene  
137 microbeads on zebrafish embryos will be assessed in accordance with the Fish Embryo Acute  
138 Toxicity Test.

139

## 140 **Review of Related Literature**

### 141 **Polyethylene**

142 Polyethylene is one of the most widely manufactured polymers in the industry [21]. Its  
143 structure consists of a long chain of carbon atoms, with two hydrogen atoms attached to each  
144 carbon atom. It is a highly versatile material that can be used to make plastic bags, plastic films,  
145 bottles, and microbeads. The plastic's melting point ranges from 110-130°C, making it highly  
146 malleable. Despite its malleability for producing a wide variety of products, it makes it a poor  
147 candidate for recycling. Despite its universal use, improper disposal of polyethylene microplastics  
148 into bodies of water makes it a vector for heavy chemical adsorption. Heavy metals such as  
149 cadmium and lead are adsorbed by these plastics and can be detrimental for both wildlife and  
150 humans [22]. It has also received criticism for containing pro-oxidants and disintegrating into  
151 smaller fragments upon exposure to light, heat, and oxygen [23].

152

### 153 **Microbeads**

154 Since its introduction to the industry in 1972, microbeads have been a popular ingredient  
155 in facial washes and facial scrubs as they serve to exfoliate and scrape away dry cells from the  
156 surface of the skin [24]. They are also incorporated in soaps and function as abrasives that remove  
157 dirt and debris found in the epidermis. The presence of plastic microbeads has been increasing in

158 aquatic systems and yet its presence has only received attention a few years ago. Recently,  
159 microbeads have been given much attention such that countries such as Canada, New Zealand,  
160 United Kingdom, and the United States of America have banned the use of microbeads in  
161 commercial products [25]. A study conducted by Jingyi et al. [10] found that due to the continuous  
162 increase of synthetic plastic production in beauty product companies and poor management of  
163 plastic waste, water pollution by microbeads has exponentially escalated and has been a great issue  
164 of concern from public authorities. In 2018, a study found many urban areas with a maximum  
165 microplastic concentration of about 517,000 particles m<sup>-2</sup> [26]. Additionally, evidence of plastic  
166 microbeads from beauty products has been reported to bypass sewage treatments and found afloat  
167 in Hong Kong bays [27] while microplastic fragments and polyethylene microbeads mistaken for  
168 fish food were found in the gastrointestinal tract of commercial Japanese Anchovy [28]. Ingested  
169 microbeads have also affected other deep-sea organisms such as mussels and oysters. These  
170 bivalves were found to contain 0.36 to 0.47 particles of microplastic per gram [29]. Recent  
171 evidence has also shown that microplastics such as microbeads have the capacity to adsorb toxic  
172 chemicals, carry harmful bacteria and release them in digestive systems once ingested [30]. The  
173 production process of polyethylene microbeads usually include intentional treatment of additives  
174 such as flame retardants, plasticizers, pigments, and UV stabilizers as these additives prevent fire  
175 hazards and maintain product integrity [31] (Gallo et al., 2018). Polyethylene may also contain  
176 some monomers such as vinyl chloride and Bisphenol A (BPA) that contain endocrine disrupting  
177 components and induce adverse effects upon ingestion or exposure [31]. In a similar study, when  
178 mice were fed with microbeads, microplastics were seen to accumulate in the liver, kidney, and  
179 intestines. The increase of this foreign substance in bodily tissues have also heightened the levels  
180 of oxidative stress in mice [32]. In lieu of microbeads easily adsorbing pollutants, another



181 pollutant associated with microbeads is polybrominated diphenyl ethers (PBDEs) known to accumulate  
182 and accumulate in shellfish consumed by humans. A study by Wardrop et al. [33] showed PBDE  
183 accumulation of up to 12.5% sourced from polyethylene microbeads of Nivea Exfoliating Face  
184 Scrub in the rainbow fish. PBDE pollutant is associated with neurological, fertility, and immune  
185 system problems, biomagnifying the aquatic food chain [4]. In effect, these studies have been a  
186 rising concern for humans and animals alike.

187

### 188 ***Facial washes with polyethylene microbeads in the Philippines***

189 The prevalence of microplastic pollution is not uncommon in the Philippines as it ranked  
190 third in the world for the highest plastic waste inputs into the ocean [34]. Statistically, the  
191 Philippines generates about 0.28 to 0.75 million metric tons of plastic litter, yearly [34]. Studies  
192 by Kalnasa et al. [35] and Paler et al. [36] investigated the occurrences of microplastic litter in  
193 Macajalar Bay and Southwestern Luzon, respectively and revealed that a large percentage of  
194 plastic litter were brightly colored spherules. Another study by Bucol et al. [37] quantified  
195 microplastics ingested by rabbitfish (*Siganus fuscescens*) from coastal areas of Negros Oriental  
196 and found an average of 0.6 particles/fish. These microplastic spherules were speculated to have  
197 originated from facial cleansers and other cosmetic products that contain microbeads.

198 In the Philippines, there are a number of facial cleansers being sold in the market that  
199 contain polyethylene microbeads such as Oil-free Acne Wash Daily Scrub, Clear Pore Daily Scrub,  
200 and Deep Action Exfoliating Scrub [38]. The rise of microbead consumption and worsening of  
201 marine litter over the years have prompted government officials like Senator Loren Legarda to  
202 draft a bill that seeks to ban microbead production in the Philippines last 2018 [20] to mitigate  
203 microbead production just as New Zealand, Austria, Belgium, and the Netherlands have. In

204 addition, Senator Loren Legarda also proposed to file a bill that will ban microplastic consumer  
205 products and single-use plastics that would otherwise bring harm to the environment [39]. In 2017,  
206 EcoWaste Coalition, along with other private groups such as Coastal Conservation, Marine  
207 Conservation Philippines, and many others endorsed a letter to the Department of Health (DOH)  
208 and Food and Drug Administration (FDA) pleading for an expedited implementation of the  
209 microbead ban. These groups stated that since plastic microbeads in drainage systems leach their  
210 way into the bodies of water, quick action must take place before they negatively affect the food  
211 chain, especially those who consume seafood [40]. Currently, DENR issued a resolution of  
212 Republic Act No. 9003 that implements the ban of single use plastics in the Philippines [41].

213

#### 214 ***Danio rerio***

215 In this study, *Danio rerio* was chosen as the test organism. The zebrafish is a valuable  
216 genetic model system for the study of developmental biology and disease [42]. They are prolific  
217 breeders that can lay up to hundreds of eggs per week [43], exhibiting high fecundity and rapid  
218 development. Their lifespan can reach up to 5 years and are omnivorous in nature [44]. For the  
219 past several years, the use for *Danio rerio* for scientific studies has been popular as it provides  
220 optical clarity when observing embryos with developing pathologies [45] as well as the  
221 developmental stages of a typical organism. They also have a high degree of genomic conservation  
222 and are likened to humans in terms of cellular, molecular, and physiological processes [42].  
223 Furthermore, these genetic and physiological similarities with humans include the brain, digestive  
224 tract, musculature, vasculature, and innate immune system. 70% of human disease genes also have  
225 similar homologs found in the genes of *Danio rerio* [46]. *Danio rerio* are preferentially used for  
226 embryonic studies as they allow clear visualization of the dynamics of organogenesis using a

227 simple stereomicroscope [42]. *Danio rerio* has been used in many toxicity studies for the reason  
228 that it is one of the best-known models of vertebrate development. The use of *Danio rerio* in  
229 studying the toxicity of microplastics is not uncommon. Despite toxicity of microplastics being  
230 common, this study differs from other studies because it focuses on polyethylene microbeads  
231 found in commercial products such as facial washes commonly used in the Philippines.

232

### 233 **Embryotoxic and teratogenic effects of microplastics**

234 Teratogens are agents or substances that induce abnormality following fetal exposure.  
235 Likewise, teratology is the study of abnormal development in embryos and the causes of congenital  
236 malformations or birth defects. These teratogens may be present on either the body surface or  
237 internal to the viscera [47]. Embryotoxicity, on the other hand, refers to injury to the embryo  
238 resulting in death or abnormal development due to exposure to toxic substances [48]. A study by  
239 Oehlmann et al. [49] conducted showed that ingestion of microplastics can affect reproduction and  
240 hormone function of marine animals like annelids, mollusks, crustaceans, insects and fish. When  
241 retained in the internal viscera for an extended amount of time, ingested microplastics may cause  
242 reproduction malfunction, increased risk of death, bioaccumulation, and even eggshell thinning  
243 [50].

244 However, a similar study conducted by Batel et al. [51] found that exposure to  
245 microplastics did not induce morphological effects on *Danio rerio* embryos nor did microplastics  
246 permanently accumulate in adult *Danio rerio* gills under 6 or 24 hours of incubation.

247 Another study stated that exposure to 1000 µg/L of microplastics significantly lessened  
248 swimming competence and speed in larval zebrafish. At gene level, this exposure resulted in  
249 upregulated expression of genes concerning “inflammation (il1b) and oxidative stress (cat)” [52].

250 In relation to exposure of zebrafish to microplastics, a study by Cormier et al. [53] stated  
251 that microplastics may be vectors for organic pollutants such as oxybenzone (BP3),  
252 benzo[a]pyrene (BaP), and perfluoro octane sulfonate (PFOS). This exposure effected alteration  
253 in *cyp1a* gene transcription, larval swimming behavior, and hatching rate at 72 hours. For other  
254 organisms such as *H. azteca*, exposure to specifically polyethylene microplastics was found to  
255 cause lessened organism growth and significant decrease of reproduction for 5000 and 10,000  
256 microplastics/mL [54].

257 A study by Gallo et al. [31] stated that exposure of marine organisms to micro and nano  
258 plastics results in bioaccumulation and adverse toxic endpoints as these microplastics contain  
259 endocrine disrupting properties such as alkylphenols, bisphenol A (BPA), and phthalate esters  
260 (DEHP) in concentrations as high as 500,000 mg/kg (ppm). The presence of microplastics  
261 increases BPA uptake in *Danio rerio* and in turn causes gene-upregulation in the central nervous  
262 system and inhibition of acetylcholinesterase (AChE), which entail that microplastics are  
263 neurotoxic [55]. A similar study by Nobre et al. [56] studied the effects of polyethylene pellets on  
264 the embryonic development of *Lytechinus variegatus* (sea urchin) and found that exposure to these  
265 microplastics induced toxic effects and increased anomalous embryonic development by 58.1%  
266 and 66.5% respectively. These findings substantiate that plastic pellets have the ability to act as  
267 vectors of pollutants that include additives contained in the surface of virgin pre-processed  
268 particles.

269 Other studies show the detrimental effects of microbeads to aquatic organisms, particularly  
270 in *Danio rerio*. A study by Träber et al. [57] implanted polyacrylamide beads into developing  
271 *Danio rerio* embryos to quantify cell-scale stress in its morphogenesis and organ formation.  
272 Stresses induced by microbead implantation had a detrimental effect on neural rod formation.

273           Lei et al. [58] observed that microplastics such as polyamides, polyethylene,  
274 polypropylene, polyvinyl chloride, and polystyrene cause intestinal damage and other adverse  
275 effects in zebrafish and in the nematode, *Caenorhabditis elegans* in freshwater pelagic and benthic  
276 environments. Absence or insignificant levels of lethality were observed in the zebrafish upon  
277 exposure at 0.001-10 mg L<sup>-1</sup> microplastics for 10 days. Meanwhile, concentrations of microplastics  
278 at approximately 70 µm resulted in intestinal damage, cracking of villi, and splitting of enterocytes  
279 in zebrafish. On the other hand, exposure of 5.0 mg m<sup>-2</sup> microplastics for 2 days notably impeded  
280 survival rates, reproduction and body length of the nematodes. For both organisms, exposure to  
281 microplastics at specific sizes contributed to decrease in calcium levels and increased expression  
282 of the glutathione S-transferase 4 enzyme in the intestine. This increase confirmed intestinal  
283 damage and increase of oxidative stress as effects of exposure to specific concentrations of  
284 microplastics. From these results, researchers suggested that toxicity of microplastics were based  
285 on size instead of their composition [58]. Although past toxicity studies related to polyethylene  
286 microplastics already exist in literature, this study differs since it investigated embryotoxicity and  
287 teratogenicity of polyethylene microbeads based on sizes found in commercially sold facial  
288 cleaners in the Philippines.

289

## 290 **Fish Embryo Acute Toxicity Test**

291           The Fish Embryo Acute Toxicity Test (FET) is a method used to study chemical  
292 toxicity in aquatic ecosystems in vivo [59]. This test (FET) is deemed advantageous for studies  
293 that need to observe the fish under varying concentrations of the test solution. Fish is primarily  
294 used in toxicity testing because of their metabolic capacities and they are, more often than not, the  
295 primary targets of water pollution and heavy metal effluents [12]. A study by Gülден et al. [60]

296 compared cytotoxicity data from fish and mammalian cell lines and found that both are equally  
297 sensitive. This study produced evidence that the Fish Embryo Acute Toxicity Test, while it is  
298 performed on fish, is extremely relevant in humans as they both show high sensitivity to FET tests.  
299 It uses 4 toxicological endpoints for the determination of toxicity in zebrafish eggs: coagulation of  
300 fertilized egg, lack of somite formation, detachment of the tail-bud from yolk sac, and lack of  
301 heartbeat [16].

302

## 303 **Methodology**

### 304 ***Danio rerio* maintenance**

305                   Thirty (30) female and twenty-five (25) male *Danio rerio* approximately 5-months-  
306 old and void of any pharmaceutical treatment were purchased from Freshwater Aquaculture  
307 Center, College of Fisheries in Central Luzon State University Science City of Munoz, Nueva  
308 Ecija. Female and male *Danio rerio* were separated and placed in two 15-gallon glass tanks three  
309 fourths ( $\frac{3}{4}$ ) filled with dechlorinated water that was maintained at  $26 \pm 1$  °C, well-aerated with  
310 dissolved oxygen at a concentration of 6.6 mg/L, electrical conductivity of 0.256 mS/cm, water  
311 hardness of 185 mg/L CaCO<sub>3</sub> and at a constant pH of  $7.2 \pm 1$  [17]. These conditions were  
312 maintained with the use of API Freshwater Master Test kit. The feeding regime consisted of *Danio*  
313 *rerio* being fed with 300 µm of Tetra®Min Tropical Flakes twice a day at 8:00 am and 4:00 pm  
314 daily. This slightly deviated from the original OECD protocol of requiring to feed *Danio rerio*  
315 with dry flake food and brine shrimp 3-5 times daily. *Danio rerio* were subjected to a 12-hour-  
316 light cycle and were acclimated for two weeks prior to the experiment. The fish were fed with egg  
317 yolk the night before mating to increase the likelihood of breeding [61].

318

## 319 **Preparation of polyethylene microbead suspensions**

320 Clear polyethylene microbeads (PE-MB) 300-355  $\mu\text{m}$  in diameter and 1.10 g/cc in density  
321 were purchased from Copsheric LLC (Santa Barbara, CA). These measurements were chosen  
322 based on a study of Chang [38] who characterized microbeads from various commercial facial  
323 exfoliating cleansers. Since PE-MB are hydrophobic in nature, they were treated with 0.01%  
324 Tween 80, a surfactant used to disperse hydrophobic particles in aqueous solutions. To prepare  
325 0.01% Tween 80 solution, a beaker was filled with distilled water and was brought to a boil for 5  
326 minutes. 0.1 g of Tween 80 per 100 ml was slowly dispensed in boiled water. After cooling, the  
327 desired amount of PE-MB was added to a test tube and was placed in a vortex mixer for at least  
328 five minutes. PE-MB was left to soak in 0.01% Tween 80 for 24 hours or until equal dispersion  
329 was achieved [62]. Polyethylene microbeads were then filtered from 0.01% Tween 80 using  
330 Whatman® Grade 1 filter paper with a pore size of 11  $\mu\text{m}$ . Afterwards, polyethylene microbead  
331 suspensions (PE-MBS) were prepared by adding polyethylene microbeads to a solution consisting  
332 of reconstituted water and 1% DMSO, an organic solvent capable of softly dissolving PE-MB and  
333 producing a suitably concentrated stock solution [17]. Sterile and aerated reconstituted water was  
334 used in the preparation of PE-MBS [63]. Three concentrations of PE-MBS were prepared based  
335 on previous studies on microplastic toxicity by [63] that used the same concentrations [1]. The  
336 three concentrations of microbead test suspensions used in this study are 20  $\mu\text{g/L}$ , 200  $\mu\text{g/L}$  and  
337 2000  $\mu\text{g/L}$ .

338

339

340

341 **Egg production and collection of fertilized eggs**

342 *Danio rerio* eggs were collected using mass spawning. The number of *Danio rerio*  
343 used for mass spawning from the original OECD protocol was modified to acquire the desired  
344 number of *Danio rerio* eggs for the study. Groups of *Danio rerio* with a sex ratio of 1 female: 3  
345 males were placed in spawning tanks [64] and were exposed to a 14-hour-light cycle the day  
346 before the eggs were collected [17].

347 A spawn trap was placed inside the spawning tank as a means of collecting *Danio rerio*  
348 eggs. Spawn traps were covered with an inert wire mesh with a size approximately  $2\pm 0.5$  mm to  
349 prevent predation by adult *Danio rerio*. Mating, spawning and fertilization took 30 minutes after  
350 the onset of light on the day of testing and eggs collected through spawn traps [17]. After collecting  
351 the eggs from the spawning tank, they were rinsed with reconstituted water. Reconstituted water  
352 consisted of 294.0 mg/L  $\text{CaCl}_2 \cdot 2\text{H}_2\text{O}$ , 123.3 mg/L  $\text{MgSO}_4 \cdot 7\text{H}_2\text{O}$ , 63.0 mg/L  $\text{NaHCO}_3$ , 5.5 mg/L  
353 KCl [65]. A volume of 0.05 ml of Methylene blue was also added to reconstituted water to prevent  
354 fungal and parasitic infection that may occur in *Danio rerio* eggs [66]. The reconstituted water  
355 solution was aerated for a minimum of 24 hours before being used in the experiment. Fertilized  
356 eggs were sorted from unfertilized eggs. The fertilized eggs were transferred to multi-well plates  
357 with the reconstituted water. The number of unfertilized and fertilized eggs were counted to check  
358 the validity of the results obtained from the Fish Embryo Acute Toxicity test as overall fertilization  
359 rate of all eggs collected must be  $\geq 70\%$  in the batch tested [17].

360

361



## 362 **Fish Embryo Acute Toxicity Test**

363           The fertilized eggs were immersed in the test solution immediately after egg collection.  
364   The viable fertilized eggs and the unfertilized eggs were separated and counted for raw data. After  
365   separation, 60 viable fertilized eggs per treatment group were placed in a chamber containing their  
366   respective test concentrations (Table 1) for initial exposure [17]. A dropper was used to transfer  
367   viable fertilized eggs from their respective chambers to 96-well plates containing microbead test  
368   suspensions. For the experimental set-up of the Fish Embryo Acute Toxicity Test, 20 *Danio rerio*  
369   embryos per test concentration with 3 replicates each will be placed in 96-well plates containing  
370   the test concentrations.

371

372

373

374

375

376

377

378

379

380 **Table 1. Experimental setup showing the composition and volume of each treatment used in**  
381 **the Fish Embryo Acute Toxicity test.**

| Treatment              | Volume in mL | Composition         |
|------------------------|--------------|---------------------|
| Negative control       | 0.5          | Reconstituted Water |
| Internal Plate Control | 0.5          | Reconstituted Water |
| Positive Control       | 0.5          | 5% ethanol          |
| Solvent Control        | 0.5          | 1% DMSO             |
| Emulsifier Control     | 0.5          | 0.01% Tween 80      |
| Treatment 1            | 0.5          | 20 µg/L PE-MBS      |
| Treatment 2            | 0.5          | 200 µg/L PE-MBS     |
| Treatment 3            | 0.5          | 2000 µg/L PE-MBS    |

382

383

384 Shown in Table 1 is the experimental setup done for the Fish Embryo Acute Toxicity Test.

385 Five internal plate controls containing sterile reconstituted water will be added to each 96-well

386 plate to identify any potential contamination of the plates by the manufacturer that may be

387 suspected to affect the outcome of the results [17]. If more than one embryo dies per plate in the

388 internal plate control, the test is considered invalid and must be performed again. Reconstituted

389 water was specifically used as a reference solution for negative and internal plate control as *Danio*

390 *rerio* embryos have stricter requirements than adult fish and may be more susceptible to disease if

391 incubated in regular distilled water [67]. Five percent (5%) ethanol served as the reference  
392 substance for positive control as it is known to be a neurotoxicant that induces deformations and  
393 mortality in *Danio rerio* [68]. 1% DMSO and 0.01% Tween 80 served as solvent and emulsifier  
394 controls, respectively, as they were used in the preparation of PE-MBS and to ensure that these  
395 substances do not cause embryotoxicity and teratogenic abnormalities to the organisms under  
396 investigation.

397 Water temperature was made sure to be maintained at  $26 \pm 1$  °C in the test chambers at any  
398 time during the test. Certain parameters of newly fertilized *Danio rerio* eggs were checked to  
399 ensure that it is valid for the Fish Embryo Acute Toxicity Test.

400

401 The following factors were observed in the collected eggs for the test results to be valid:

- 402 1. Overall fertilization rate of all eggs collected must be  $\geq 70\%$  in the batch  
403 tested.
- 404 2. Overall survival of embryos in the negative and solvent control must be  $\geq$   
405 90% at the end of the 96 hour exposure.
- 406 3. Exposure to the positive control must result in mortality not less than 30%  
407 at the end of the 96 hour exposure.
- 408 4. Hatching rate in the negative and solvent control must be  $\geq 80\%$  at the end  
409 of the 96 hour exposure.

410

#### 411 **Observations for the Fish Embryo Acute Toxicity Test**

412 The following toxicological endpoints were observed using a Leica ES2 Stereoscope with  
413 a magnification of 100x: (1) coagulation of embryos, (2) lack of somite formation, (3) non-

414 detachment of the tail, (4) lack of heartbeat, and (5) hatching rate. For embryo coagulation, it was  
415 observed as milky white, yet it appeared dark under the microscope. For lack of somite formation,  
416 it should be noted that a zebrafish embryo undergoing normal development at  $26 \pm 1$  °C, will form  
417 approximately 20 somites after a day. In addition, side-to-side contractions of the embryo  
418 signifying somite formation were observed. Lack of somite formation was also recorded after 24,  
419 48, 72, and 96 hours. Non-detachment of the tail means absence of a posterior extension of the  
420 body of the embryo. Absence of this was recorded after 24, 48, 72, and 96 hours. Lack of heartbeat  
421 was recorded after 48, 72, and 96 hours since visibility of heartbeat occurs after 48 hours of a  
422 normally developing zebrafish embryo at  $26 \pm 1$ °C. It should be noted that erratic heartbeat and  
423 visible heartbeat in the absence of circulation in aorta abdominalis are non-lethal. Hatching, despite  
424 not being a teratogenic endpoint involved in the calculation for LC<sub>50</sub>, was observed and recorded  
425 after 47, 72 and 96 hours for it ensures exposure of the embryo in the absence of a potential barrier  
426 function of the chorion.

427

428 Any positive results observed for any of the toxicological endpoints rendered the *Danio*  
429 *rerio* embryo dead. Moreover, hatching and heartbeat were observed in control and treatment  
430 groups from 48 up to 96 hpf were recorded as well. The remaining toxicological endpoints were  
431 recorded every 24 hours until the end of the 96 hour exposure.

432

433 At 144 hpf, *Danio rerio* larvae were euthanized using hypothermic shock. The fish were  
434 quickly immersed in an ice bath consisting of 5 parts ice and 1 part distilled water for 40 minutes  
435 or until cessation of gill and heart movement was observed [69]. Once movement was no longer  
436 visible, *Danio rerio* were mounted in glass slides with 10% glycerol. Prepared microscope slides

437 were then observed under Leica ES2 Stereoscope with a magnification of 100x to assess the  
438 different teratogenic effects induced by PE-MBS such as yolk sac edema, pericardial edema, bent  
439 body axes, tail curvature and collapsed swim bladder.

440

#### 441 **Statistical Analysis for Fish Embryo Acute Toxicity Test**

442 Cumulative mortality, cumulative hatching, number of malformations, and the number of  
443 embryos that represent coagulation, lack of somite formation, non-detachment of tail, lack of  
444 heartbeat, and hatching, respectively for all treatments after the 24, 48, 72, 96 hour exposure were  
445 recorded. Probit analysis for the estimation of LC<sub>50</sub> values at 96 hour exposure for mortality with  
446 a 95% confidence limit was recorded for graphing and interpretation as well [17]. It should be  
447 noted that LC<sub>50</sub>

448 Treatment effects of the different concentrations of microbead suspensions on the  
449 developmental parameters and mortality of *Danio rerio* embryos were determined using one-way  
450 analysis of variance (ANOVA). Kruskal-Wallis test was performed if data did not pass Shapiro-  
451 Wilk's test of normality. Dunnett's test was used to compare the treatment means with their  
452 corresponding controls if parameter assumptions of normality and homogeneity of variances were  
453 met whereas Dunn's test was used to analyze obtained data if assumptions were not met. Multiple  
454 comparisons among the three treatments were performed through Tukey-Kramer *post hoc* test.  
455 Statistical analyses were executed using Microsoft Excel Real Statistics Software. Data is  
456 significant for  $p \leq 0.05$ .

457

458

459 **Institutional Animal Care and Use Committee (IACUC)**

460 Under guidelines of the Institutional Animal Care and Use Committee, *Danio rerio* was  
461 used in this study for the interest of relevance to human and animal health, to improvement of  
462 knowledge, and to the good of society [70]. Researchers involved in the experiment ensured proper  
463 handling of the specimens.

464 Factors affecting the housing and feeding of the *Danio rerio* such as UV-sterilization,  
465 ventilation, aeration (6.6 mg/L O<sub>2</sub>) temperature (26 ± 1 °C), water cleaning, water salinity (185  
466 mg/L CaCO<sub>3</sub>), electrical conductivity (0.256 mS/cm), and pH (7.2 ± 1) were adjusted in  
467 accordance to the proper care and breeding of *Danio rerio* as earlier mentioned in the methodology.

468 *Danio rerio* were placed and maintained in 2 15-gallon glass tanks. Dimensions of each  
469 glass tank were 20" x 10" x 12". 15% of the water in glass tanks was replaced every week. Before  
470 replacement, the tap water acquired in the sanitized gallon-sized bucket was pre-treated first with  
471 a water conditioner to adjust the pH level and to remove toxins and metal residue in the tap water.  
472 Water was UV-sterilized with a portable UV water sterilizer submerged and stirred in the bucket  
473 until light of the sterilizer turned off.

474 After UV sterilization, the water in the tank was removed with a siphon tip placed into the  
475 tank's substrate at the bottom. The siphon removed debris and the tank water. Temperature of the  
476 remaining water in the tank and that of the new water in the buckets were measured with a  
477 thermometer to know if temperatures were near to one another. Pretreated water was poured slowly  
478 into the tanks [71].

479 They were fed properly and regularly. The fish were fed twice everyday as earlier stated in  
480 the methodology.

481           After conducting the study, adult *Danio rerio* used for breeding were returned to their  
482 original tanks. *Danio rerio* embryos and larvae used in the Fish Embryo Acute Toxicity Test were  
483 placed in sealed plastic bags for garbage collection.

484

## 485 **Results and Discussion**

486           The use of the Fish Embryo Acute Toxicity Test in this study has shown that polyethylene  
487 microbeads found in facial wash products are embryotoxic and teratogenic to *Danio rerio*  
488 embryos. Three concentrations of white PE-MBS 300-355  $\mu\text{m}$  in diameter and 1.10 g/cc density  
489 were used in this study (i.e., 20, 200 & 2000  $\mu\text{g/L}$ ) as toxicants.

490

### 491 **Embryotoxicity**

492           Polyethylene microbead embryotoxicity was evaluated using the four toxicological  
493 endpoints namely coagulation of eggs, lack of somite formation, non-detachment of tail, and lack  
494 of heartbeat [17]. Coagulated embryos are described as milky white eggs void of any structure.  
495 Lack of somite formation is characterized by absence of somites and side to side contractions.  
496 Non-detachment of tail is the inability of the embryo to extend its posterior extension while lack  
497 of heartbeat is absence of a visible heartbeat in a normally developing embryo starting at 48 hpf.  
498 Once a single toxicological endpoint is observed within the 96 hour exposure, the embryo was  
499 considered dead [17].

500           Cumulative mortality was observed until the 96th hour of the final static exposure. Ninety-  
501 six (96) hours were allotted for observing cumulative mortality since there are some chemicals  
502 (i.e. cationic polymers) that may not manifest their toxic potential until the embryo has been

503 completely liberated from the protective outer shell, the chorion. In extending the static exposure  
504 to 96 hours, zebrafish development may encompass hatching [72] and cumulative mortality may  
505 be recorded as well.

506

507         Based on the results shown in Fig 1, the number of observed deceased *Danio rerio* for all  
508 control treatments and PE-MBS concentrations were in the following decreasing order: 2000 µg/L,  
509 5% ethanol, 200 µg/L, 20 µg/L, 1% DMSO, 0.01% Tween 80, and reconstituted water for the  
510 negative control and internal plate control (S4 Appendix). The trend in Fig 1 shows that exposure  
511 to increasing concentrations of PE-MBS increased incidences of mortality as well. Upon statistical  
512 analysis, ANOVA (S9 Appendix) indicated that there is a significant difference between the means  
513 and variances of cumulative mortality of *Danio rerio* within the 96 hour exposure for all  
514 treatments.

515

516 **Fig 1. Lethal effects of PE-MBS on *Danio rerio* embryos within 96 hour exposure to**  
517 **different concentrations.**

518 Data shown is based on the average of three replicates performed in the study. Error bars indicate  
519 standard error. Single-asterisk indicates a statistically significant difference of cumulative  
520 mortality between *Danio rerio* ( $p < 0.05$ ). (\*: $p < 0.05$ ).

521

522

523         Based on the results found in Fig 2, coagulation accounted for the most frequently  
524 occurring lethal endpoint in all control solutions and PE-MBS concentrations, with mean  
525 percentages ranging from 38% to 80%. Lack of observable heartbeat was the second most recorded



526 toxicological, garnering values from 0% to 33% followed by non-detachment of tail with results  
527 ranging from 0% to 29%. Lack of somite formation accounted for the least occurring endpoint in  
528 all control solutions and PE-MBS concentrations, with percent values from 0% to 12%.

529

530 **Fig 2. Relative percentages of toxicological endpoints observed in deceased *Danio rerio* at 96**  
531 **hpf.**

532 Percentage shown is based on the average of three replicates performed in the study.

533

534 Negative controls are important since they are used to detect confounding variables [73]  
535 and serve as a basis of comparison for different test groups. Internal plate controls, on the other  
536 hand, are used to identify any potential contamination found in 96-well plates that may affect the  
537 outcome of the results [17]. Small discrepancies such as toxic endpoints observed in the negative  
538 and internal plate control may be due to extraneous variables (i.e. varying oxygen levels in well-  
539 plate, change of pressure of pipette tip into well, position of embryo in well). While extraneous  
540 variables have a wide scope that include situational variables, participant variables, investigator  
541 effects and demand characteristics; environmental factors, on the other hand, are more specific but  
542 may still fall under extraneous variables [74]. Examples of environmental variables are noise,  
543 temperature and lighting conditions of the experimental set-up.

544 In lieu of these toxic endpoints seen in the negative and internal plate controls, these results  
545 also coincided with toxicological studies of the zebrafish [75, 76]. These studies observed low  
546 zebrafish embryo mortality in their negative controls such as dilution water [75] and buffer and  
547 egg water [76]. The latter stated that “spontaneous mortality” in the first 24 hpf may have been the  
548 reason for the mortality observed in their controls, coinciding with other literature. This may also

549 explain the mortality of the control group in this study. Despite the mortality observed in these  
550 controls, these results had no significant difference. Additionally, requirements by OECD  
551 standards [17] stating that these controls should observe survival of at least 90% until the 96th  
552 hour were still met in this study.

553

554       Upon analysis of data gathered in the study, mortality of *Danio rerio* treated with 5%  
555 ethanol garnered results significantly different from the negative control all throughout the 96 hour  
556 exposure (S10 Appendix). Coagulation, lack of somite formation, non-detachment of tail, and  
557 lack of heartbeat were observed in deceased *Danio rerio*, with coagulation accounting for the most  
558 frequently occurring toxic endpoint. Although the mechanism behind egg coagulation remains  
559 unclear due to lack of related literature, coagulation induced by toxicant exposure is suspected to  
560 be a result of *Danio rerio* having temporal expression or lack of specific metabolic enzymes that  
561 may not allow it to metabolize harmful products during the entirety of the first 48 hours of  
562 development [77]. Exposure to toxic products such as ethanol may lead to complete cell and  
563 biomolecule disintegration as well as disruption to cell fate determination during organogenesis  
564 [78], which is manifested by milky white egg coagulation in *Danio rerio* embryos (Fig. 3C).  
565 Coagulation induced by 5% ethanol may be due to its toxic properties and ability to act as a  
566 desiccant and protein denaturant at high concentrations [79]. Lack of visible heartbeat also  
567 occurred and may possibly have been a result of its disruption of the central nervous system and  
568 inhibition of acetylcholinesterase [80] that may have caused complications related to heart failure.  
569 Data obtained from this study coincide with the study conducted by Hallare et al. [81].

570

571

572 **Fig 3. Toxicological endpoints observed in *Danio rerio*.**

573 (A) normal development of *Danio rerio* at 48 hpf observed in the negative control (RW), 0.01%  
574 Tween 80, 80% DMSO, and 20 µg/L PE-MBS. A. Embryo demonstrates eye bud (Eb), chorion  
575 (Ch), yolk (y), somites (s), and tail (t). 3 of the 4 toxicological endpoints denoting mortality: (B)  
576 lack of somite formation (*arrow*), (C) coagulation of eggs, and (D) non-detachment of tail (*arrow*)  
577 observed primarily in the positive control (5% ethanol), 200 µg/L PE-MBS, and 2000 µg/L PE-  
578 MBS.

579

580 Dunnet's test results revealed that there is no significant difference between the means and  
581 variances of mortality obtained for 0.01% Tween 80 and 1% DMSO with the negative control all  
582 throughout the 96 hour exposure (S10 Appendix). Manifestations of cardiac failure in embryos  
583 treated with 0.01% Tween 80 may be due to its low order toxicity [82] and capability to cause  
584 electrophysiologic changes to the cardiac conduction system [83] whereas visible heartbeat  
585 observed in *Danio rerio* treated with 1% DMSO may be due to its disruption of the central nervous  
586 system and inhibition of acetylcholinesterase [80]. Although both substances are embryotoxic and  
587 inducers of various developmental effects at high concentrations as evidenced in previous studies  
588 [82, 81], Tween 80 and DMSO were diluted to concentrations 0.01% and 1% respectively. Dilution  
589 of these substances were effective in making them appropriate surfactants and solvents for PE-MB  
590 [17] without causing embryotoxicity of remarkable difference with the negative control.

591 The results obtained for *Danio rerio* embryos treated with 20 µg/L PE-MBS did not show  
592 a significant difference with the negative control all throughout the 96 hour exposure (S10  
593 Appendix) which suggests that 20 µg/L PE-MBS is a concentration not sufficient enough to induce  
594 embryotoxic effects to *Danio rerio* embryos. However, Dunnet's test revealed significant

595 differences between the means of the cumulative number of deceased *Danio rerio* treated with 5%  
596 ethanol, 200 µg/L PE-MBS, and 2000 µg/L PE-MBS with the negative control at all exposure  
597 times within the 96 hour period (S10 Appendix).

598 Occurrences of egg coagulation (Fig. 3C) were most frequently observed during the first  
599 48 hours of exposure for embryos treated with PE-MBS; thus, it is speculated that coagulation is  
600 associated with a defect in the early embryonic stages of development (e.g., blastulation and  
601 gastrulation). These developmental processes are highly conserved as few alterations may cause  
602 lethal effects to the embryo [84]. Coagulation induced by PE-MBS is due to the toxic chemical  
603 components of polyethylene. According to a study by Gallo et al. [31], polymers of microplastics,  
604 even in extremely low concentrations, contain toxic chemical additives such as flame retardants,  
605 plasticizers, UV stabilizers and pigments that are intentionally treated to the surfaces of virgin  
606 polyethylene microplastics during the production process to reduce fire hazards and maintain  
607 product integrity. Another study by Rochman et al. [3] stated that virgin pre-production polyethene  
608 microplastics contain Endocrine-Disrupting Chemicals (EDCs) such as bisphenol A (BPA). Aside  
609 from BPA being an exogenous compound that interferes with metabolic pathways and proper  
610 functioning of the endocrine system [5, 85], accumulated evidence from past studies have  
611 ascertained that BPA is cytotoxic, have the ability to alter gene integrity [85, 86] and induce cell  
612 apoptosis and organ necrosis to developing vertebrates [87]. In this study, 1% DMSO was used as  
613 a solubilizing agent to produce a suitable suspension for polyethylene microbeads [17]. Soft  
614 extraction of polyethylene microbeads by DMSO may have caused leaching of toxic additives and  
615 other EDCs that permeated through the chorion pores, caused cell disintegration and ultimately  
616 led to incidences of milky white embryo coagulation (S2 Appendix).

617           Development of the heart begins at 16 hpf in which cardiac precursor cells start to  
618 differentiate and travel towards the central midline of *Danio rerio* embryos [83]. Occurrences of  
619 lack of observable heartbeat were observed in *Danio rerio* treated with PE-MBS during the  
620 embryonic and larval stage (S4 Appendix). The number of deceased *Danio rerio* due to lack of  
621 heartbeat increased upon increase in PE-MBS concentration (S2 Appendix). This may be attributed  
622 to hypoxia caused by PE-MBS exposure during the earlier developmental stages of *Danio rerio*.  
623 Accumulated evidence supports a study by Malafaia et al. [5] that polyethylene microbeads cause  
624 hypoxia in *Danio rerio* embryos as these microplastics may adhere to the chorionic membrane  
625 [88]. Since chorionic pores measure approximately less than 1  $\mu\text{m}$  in diameter, polyethylene  
626 microbeads that measure 300-355  $\mu\text{m}$  most likely became a barrier that hindered the passage of  
627 diffusing oxygen, and consequently interfered with gas exchange. Disruption in gas exchange  
628 results in critically low oxygen availability that induces a reactive response in which certain  
629 respiratory processes are accelerated [89] and cases of premature hatching may occur [5]. A  
630 significant number of early hatching (i.e., hatching at the 48 hpf mark) in *Danio rerio* treated with  
631 200 and 2000  $\mu\text{g/L}$  PE-MBS were observed (S5 Appendix) and may be suspected to be due to the  
632 breakdown of the chorion as a means to increase oxygen uptake in *Danio rerio* [5]. Despite greater  
633 oxygen uptake, premature hatching produces underdeveloped larvae with teratogenic  
634 abnormalities that synergistically contribute to post-hatching mortality [5]. In a study by Kuiper et  
635 al. [90], they also found that exposure of *Danio rerio* to plastic additives such as flame retardants  
636 found in microplastics contain toxic chemicals that cause high post-hatching mortality and  
637 pericardial fluid accumulation in juvenile larvae evidenced by manifestations of pericardial edema  
638 (S7 Appendix), both in which coincide with the results obtained in the conducted study.

639           The first sign of somite differentiation occurs after gastrulation [84]. It is from these  
640 somites that muscle cells are derived from. It is also during somitogenesis when the tail begins to  
641 extend and separate itself from the yolk. Alterations in somitogenesis due to substance toxicity  
642 affect normal development and may cause a defect in somite formation and tail detachment [84].  
643 Incidences of embryos exhibiting lack of somite formation and non-detachment of tail were  
644 observed in *Danio rerio* treated with PE-MBS (S2 Appendix) and may be attributed to chemical  
645 additives and EDCs added to pre-production polyethene microplastics [85]. Related literature  
646 outside of this study suggests that observed toxic endpoints related to somite defect may be  
647 associated with ectodermal implications during somitogenesis [91]. Somite formation is initiated  
648 by the motion waves of gene expression that originate from the head [92], and since EDCs alter  
649 gene integrity, they may have affected normal development as well. However, further studies must  
650 be conducted to investigate to know the specific genes and the level of gene expression EDCs pose  
651 an effect on.

652

653

654           The concentration-mortality curve of *Danio rerio* at 96 hpf as shown in Fig 4 indicates that  
655 there is an increasing trend in mortality rate as the concentration of PE-MBS increases. Results  
656 from Tukey Kramer's *post hoc* test (S11 Appendix) revealed that there is a significant difference  
657 between the means of the cumulative number of deceased *Danio rerio* treated with different  
658 concentrations of PE-MBS at 96 hpf which substantiates early speculations that PE-MB toxicity  
659 is dose dependent and causes concentration-dependent reduction in *Danio rerio* survival.

660

661

662 **Fig 4. Concentration-Mortality curve in FET of *Danio rerio* treated with PE-MBS at 96**  
663 **hpf.**

664 Error bars indicate standard error. Single-asterisk indicates a statistically significant difference of  
665 cumulative mortality between *Danio rerio* at 96 hpf ( $p < 0.05$ ). (\*: $p < 0.05$ ).

666

667

668 In Fig 5, the computation of  $LC_{50}$  using probit analysis, while taking into consideration  
669 results obtained from the negative control, revealed that the lethal concentration of polyethylene  
670 microbeads causing mortality to 50% of the population under study is 2455.096  $\mu\text{g/L}$  (S12  
671 Appendix). The value garnered for the  $LC_{50}$  of PE-MB is higher than treatment concentrations  
672 used in the study (i.e., 20, 200, and 2000  $\mu\text{g/L}$  PE-MBS).

673

674 **Fig 5. Probit analysis for the estimation of  $LC_{50}$  values of *Danio rerio* exposed to PE-MBS.**

675 Analyzed results showed that the  $LC_{50}$  is 2455.096  $\mu\text{g/L}$  with 95% confidence limits. Error bars  
676 indicate standard error.

677

678

679 **Hatching**

680 Hatching is a critical stage in the embryogenesis of *Danio rerio* for it aids in the evaluation  
681 of developmental delays and toxicity caused by different substances [93]. A normally developing  
682 *Danio rerio* typically hatches between 48 to 72 hpf [94]. *Danio rerio* embryos hatched in the 96  
683 hpf mark are considered late hatchers whereas those hatched in 48 hpf are considered early  
684 hatchers [95].

685           Based on the results shown in Fig 6, the majority of *Danio rerio* embryos hatched at 72  
686 hpf. Embryos treated with 5% ethanol showed the highest number of hatching at 96 hpf. The trend  
687 in Fig 6 shows an increasing number of embryos hatching at 48 hpf upon increase in PE-MBS  
688 concentration. With these results, administration of statistical analysis of ANOVA indicated that  
689 there is a significant difference between the means and variances of the number of hatched *Danio*  
690 *rerio* within the 96 hour exposure to all treatments (S13 Appendix).

691

692

693 **Fig 6. Cumulative number of hatched *Danio rerio* within 96 hour exposure to different**  
694 **treatments.**

695 Data shown is based on the average of three replicates performed in the study. Error bars indicate  
696 standard error. Single-asterisk indicates a statistically significant difference of cumulative  
697 hatching between *Danio rerio* ( $p < 0.05$ ). (\*: $p < 0.05$ ).

698

699           All throughout the 96 hour exposure, results from Dunnet's test indicated that no  
700 significant difference in the means of the cumulative number of hatched individuals in *Danio rerio*  
701 treated with 0.01% Tween 80 and 1% DMSO with the negative control was present (S14  
702 Appendix). Although these substances cause teratogenic and embryotoxic effects in high doses  
703 [96, 97], they were diluted in accordance to OECD guidelines to induce effects of negligible  
704 difference with the negative control while serving as appropriate solvents for the toxicant under  
705 study [17].

706           At 48 hpf, Dunnet's test revealed that no significant differences were noted in the means  
707 of the number of hatched *Danio rerio* treated with 20 $\mu$ g/L PE-MBS and 5% ethanol with the



708 negative control but there is a notable difference for the results garnered for *Danio rerio* treated  
709 with 200 and 2000 µg/L PE-MBS with the negative control. This indicates that high concentrations  
710 of PE-MBS induces early hatching in *Danio rerio* embryos. This physiological phenomenon may  
711 be a result of hypoxia caused by PE-MB. All vertebrates rely on diffusion for both gas exchange  
712 and respiratory gas transport, especially in the early stages of development [89]. Microbeads used  
713 in the study measured 300-355 µm in size whereas the diameter of the chorionic pores in *Danio*  
714 *rerio* measures less than 1 µm [88]. Possible adherence of PE-MB in the chorionic membrane of  
715 *Danio rerio* during embryogenesis may have resulted in clogged pores, hindered gas exchange and  
716 consequently, insufficient oxygen supply. As stated in a study by Burrgrren and Pinder [89],  
717 hypoxia in *Danio rerio* embryos increases truncal muscle movement to agitate water contained  
718 inside the chorion and accelerates certain metabolic and respiratory processes to compensate for  
719 lack of oxygen [98]. These stress-induced responses as a result of hypoxic environment is also  
720 accompanied by premature hatchings since removing the resistance of the chorionic membrane is  
721 known to increase oxygen uptake in *Danio rerio* embryos [89]. Notably, recorded data revealed  
722 that despite hatching earlier than other treatment groups, *Danio rerio* treated with 200 and 2000  
723 µg/L PE-MBS had lower survival rates after hatching (S4 Appendix). This reinforces the  
724 hypothesis that exposure to high doses of PE-MB is both teratogenic and embryotoxic.

725 For both 72 and 96 hpf, the means of the cumulative number of hatched individuals treated  
726 with 20 µg/L PE-MBS did not have a significant difference with the negative control, supporting  
727 early speculations that 20 µg/L PE-MBS is not sufficient enough to induce developmental delays  
728 nor premature hatching. However, Dunnet's test results for 5% ethanol garnered a significant  
729 difference since a number of embryos died before hatching. The same is true for *Danio rerio*  
730 treated with 200 and 2000 µg/L PE-MBS since polyethylene microplastics have the ability to

731 induce embryotoxic effects. Remarkably, a number of late hatchers were noted in *Danio rerio*  
732 treated with 5% ethanol as ethanol is known to cause harmful complications and slow down certain  
733 processes such as hatching and heart rate [97].

734 Results from Tukey-Kramer's test for the cumulative number of hatched individuals within  
735 the 96 hour exposure revealed that all three concentrations of PE-MBS are significantly different  
736 from each other thus indicating that the rate of premature hatching in *Danio rerio* is dose-  
737 dependent and steadily increases depending on the dose administered (S15 Appendix).

738

### 739 **Teratogenicity**

740 Teratogenic endpoints are important to determine the teratogenic potential of a chemical  
741 [99] and to generalize the response of *Danio rerio* towards this toxicant [81] of varying  
742 concentrations. The most common malformations were edema, bent tail, bent body axis, and  
743 collapsed swim bladder. Edema is defined by the accumulation of pellucid fluid in the pericardium  
744 or in the yolk sac. A bent tail is observed in an abnormal, dorsoventral or lateral flexion of the tail  
745 at the axial level of the caudal fin. A bent body axis is observed in an abnormal flexion of the  
746 primary axis. Lastly, a collapsed swim bladder may be more unexpanded than the normal  
747 phenotype of a *Danio rerio* swim bladder [96].

748

749

750

751 As shown in Fig 7, the average number of malformations observed in all treatments and  
752 controls were in the following decreasing order: 2000 µg/L PE-MBS, positive control (5%  
753 ethanol), 200 µg/L PE-MBS, 20 µg/L PE-MBS whereas 1% DMSO, and 0.01% Tween 80 garnered

754 the same value (S6 Appendix). The embryos in the negative control and the internal plate control  
755 did not show any malformations. With these results, administration of statistical analysis of the  
756 Kruskal-Wallis Test indicated that there is a significant difference between the means and  
757 variances of the number of malformations observed in *Danio rerio* within the 96 hour exposure to  
758 all treatments (S16 Appendix). The trend showed that increasing PE-MBS concentration resulted  
759 in an increased number of malformations as well.

760 **Fig 7. Total number of malformations observed in *Danio rerio* for each treatment at 144**  
761 **hpf.**

762 Error bars indicate standard error. Single-asterisk indicates a statistically significant difference of  
763 total number of malformations between *Danio rerio* at 144 hpf ( $p < 0.05$ ). (\*: $p < 0.05$ ).

764

765

766

767

768 As shown in Fig 8, edema had the highest number of incidents for each group, garnering a  
769 range of percent values from 62% to 100%. Bent body axis at 8% to 33% and bent tail with percent  
770 values of 21% to 24% came next while the collapsed swim bladder was the least observed  
771 teratogenic endpoint for all groups, garnering percent values from 3% to 13%.

772

773 **Fig 8. Relative percentages of malformations observed in *Danio rerio* for each treatment at**  
774 **144 hpf.** Percentage shown is based on the average of three replicates performed in the study.

775

776

777

778           According to Ali et al. [96], one of the abnormalities found in *Danio rerio* subjected to  
779 8000 mg/L ethanol was pericardial edema. Another study [100] found that even at lesser  
780 concentrations of ethanol (1.5% and 2%), abnormalities such as bent body axis were observed in  
781 *Danio rerio* embryos. That being said, all literature coincided with the observations in embryos  
782 treated with 5% ethanol in this study (Fig. 9B, 10C, 11A, 11B). Dunn's Test (S17 Appendix) had  
783 also indicated that the positive control, the 5% ethanol significantly differed with the negative  
784 control.

785

786           Ali et al. [96] stated that *Danio rerio* embryos subjected to 200 mg/L Tween 80 exhibited  
787 dispersed pigment cells, bent body axis, and branchial arch hypoplasia. However, since Tween 80  
788 was diluted to lesser concentrations in this study, the mean observation found in *Danio rerio*  
789 embryos subjected to the resulting concentration was too negligible to significantly differ with the  
790 negative control (Fig. 9A, 10B, 11A). Meanwhile, DMSO was reported as a teratogen at higher  
791 concentrations [101]. However, at lesser concentrations likened to 1%, embryos treated with 1%  
792 DMSO did not exhibit significant teratogenicity (Fig. 9A, 10B, 11A). This finding also coincided  
793 with other studies [101, 81]. Statistically, 0.01% Tween 80 and 1% DMSO both did not  
794 significantly differ with the negative control as well (S17 Appendix).

795           Two hundred (200) and 2000 µg/L PE-MBS treatment groups significantly differed with  
796 the negative control (S17 Appendix); however, concentration of 20 µg/L PE-MBS treatment was  
797 too negligible to significantly differ with the negative control. With that said, polyethylene  
798 microbeads may affect the body axis, body proportion and other morphological parameters of  
799 aquatic organisms depending on PE-MBS concentration. Their sizes [102] may also be a factor  
800 associated with malformation.

801           The Tukey Kramer Test indicated significant differences between all PE-MBS treatment  
802 groups. Results also showed that the number of deformities increased upon increase of PE-MBS  
803 concentration. This may be interpreted that higher concentration of PE-MBS induces greater  
804 teratogenicity in *Danio rerio*. In spite of early speculation, polyethylene microbeads may have  
805 caused disturbance to regulating barriers in internal water diffusion [5], possibly substantiating  
806 increasing incidents of edema in increasing concentrations. Edema being the highest number of  
807 type of malformation in all PE-MBS treatment groups, may be regarded as a symptom of hypoxia  
808 in *Danio rerio* embryos, further substantiating that PE-MB may cause hypoxia [5]. It has also been  
809 observed that sublethal stages of hypoxia can increase embryonic fish malformations by 77.4%  
810 ultimately resulting in decline of species' fitness and aquatic populations [103].

811           Bent tails have also been reported in microplastic-treated *Danio rerio* adults at moderate  
812 and high concentrations [104], coinciding with another article as well [105]. In the former study,  
813 bent tails observed in polyethylene microplastic treated *Danio rerio* may be associated with  
814 “knockdown of the cysteine-rich motor neuron 1 gene (*crim1*) or missense mutation in polycystin-  
815 2(*pkd2*).” This gene encodes for the activation of the  $Ca^{2+}$  cation channel which is important in the  
816 skeletal muscle excitation-contraction [106] that may be depicted in the tail movement of the  
817 zebrafish. However, Kaleuff [107] recommends further investigation regarding whether exposure  
818 to microplastics significantly changes the level of target gene expression and phenotype. Bent body  
819 axes were also observed in polyethylene microplastic treated *Danio rerio* embryos [5]. Further  
820 observation and findings are needed to associate these teratogenic effects to adhesion of  
821 polyethylene microbeads to the external surface and to the gastrointestinal system of the *Danio*  
822 *rerio* embryo; however a study of Malafaia et al. [5] associates these teratogenic effects to this  
823 occurrence.

824 Collapsed swim bladders have also been evident in the 200  $\mu\text{g/L}$  PE-MBS treatment but  
825 more especially in the 2000  $\mu\text{g/L}$  PE-MBS treatment (Fig. 9B). The swim bladder, an aid in making  
826 upward hydrodynamic forces in prevention from sinking [108], was exhibited to be collapsed in  
827 *Danio rerio*, and this may have resulted from hypoxia [107] possibly induced by 200  $\mu\text{g/L}$  and  
828 2000  $\mu\text{g/L}$  PE-MBS. Collapsed swim bladders have also been observed in *Danio rerio* embryos  
829 affected by nano plastics [11].

830 With substantiating the results from the Tukey Kramer Test indicating significant  
831 differences between all PE-MBS treatment groups (S19 Appendix), it can be said that  
832 teratogenicity increases with increasing PE-MBS concentration.

833

834 **Fig 9. Fresh mount of *Danio rerio* at 144 hpf showing collapse of the swim bladder.** (A)

835 shows normal development of the swim bladder (swb) observed in the negative control (RW),  
836 0.01% Tween 80 % DMSO, and 20  $\mu\text{g/L}$  PE-MBS. (B) shows collapsed swim bladder (cswb)  
837 observed in the following treatments of increasing order: the positive control (5% ethanol), 200  
838  $\mu\text{g/L}$  PE-MBS, and 2000  $\mu\text{g/L}$  PE-MBS.

839

840 **Fig 10. Fresh mount of *Danio rerio* at 144 hpf with different severities of yolk sac and**  
841 **pericardial edema.**

842 (A) shows the normal development observed in the negative control (RW) with normal yolk sac  
843 (ys) and pericardium (p). (B) exhibits mild yolk sac edema (myse) observed in treatments 0.01%  
844 Tween 80 and 1% DMSO and mild pericardial edema (mpe). (C) shows severe yolk sac (syce)  
845 and pericardial edema (spe) both observed in 200 $\mu\text{g/L}$  PE-MBS, 2000 $\mu\text{g/L}$  PE-MBS, and 5%

846 ethanol with the last two respective treatment and control groups exhibiting the most incidents of  
847 edema.

848

849 **Fig 11. Fresh mount of *Danio rerio* at 144 hpf showing bent body axis and tail curvature.**

850 (A) exhibits bent body axis (bba). (B) exhibits tail curvature (tc). Both malformations were  
851 observed in the positive control (5% ethanol) and in treatments, 200 and 2000 µg/L PE-MBS.  
852 Bent body axis was observed in the 20 µg/L PE-MBS.

853

854

855

856

857 **Heartbeat**

858 The heart rate of a developing zebrafish embryo is usually at 120-180 beats per minute  
859 (bpm) and it is usually visible at 48 hpf. It is a significant endpoint that should be observed to  
860 ensure tissue perfusion in all parts of the developing embryo [109].

861 As shown in Fig 12, the general trend was that the fastest bpm was always evident in the  
862 96 hpf while the slowest bpm was observed in the 48 hpf for each treatment and control group.  
863 This is because the heart rate increases as development takes place [109]. As shown in the Fig 12,  
864 embryos in PE-MBS treatments steadily increased heart rate as the PE-MBS concentration  
865 increased. As for the control groups, each group showed steady increase of heart rate in exception  
866 to the positive control. Embryos in the positive control showed a slower rate of heartbeat as each  
867 succeeding 24th hour went by.

868

869 **S12 Fig. Heart rate (bpm) observed in *Danio rerio* for each treatment.**

870 Data shown is based on the average of three replicates performed in the study. Error bars indicate  
871 standard error. Single-asterisk indicates a statistically significant difference of heart rate between  
872 *Danio rerio* ( $p < 0.05$ ). (\*: $p < 0.05$ ).

873

874

875 But among all groups, the fastest average bpm was evident in embryos treated with 2000  
876  $\mu\text{g/L}$  PE-MBS at 96 hpf (i.e., 203 bpm) while the slowest average bpm was observed in the positive  
877 control at 96 hpf (i.e., 137 bpm).

878 With these results, statistical analyses of ANOVA indicated significant differences  
879 between the means and the variances of each treatment (S20 Appendix). These results led to *post*  
880 *hoc* analysis, namely the Dunnett's Test (S21 Appendix) and the Tukey Kramer Test (S22  
881 Appendix). At all hpf, means of all treatments had significant differences with those in the negative  
882 control in exception to ones in 0.01% Tween 80, 1% DMSO and 20  $\mu\text{g/L}$  PE-MBS. Meanwhile,  
883 the latter test indicated significant differences between all PE-MBS treatments.

884 In a normal embryonic development of *Danio rerio*, the heart rate increases as development  
885 takes place [109] as earlier mentioned. Increased heart rate had been observed in all treatments in  
886 exception to 5% ethanol. Ethanol may cause decrease in size of ventricles and lessen the number  
887 of cardiomyocytes in the heart of a developing zebrafish [110], leading to mortality and effects of  
888 teratogenicity. Hallare et al. [81] also stated that ethanol greater than 1.5% concentration caused  
889 developmental delays in heart beating. This finding also coincided with other studies [80,111].  
890 Hence, 5% ethanol had a significant difference with the negative control for all hpf.



891 For other chemicals, means of heart rate in 0.01% Tween 80 and in 1% DMSO did not  
892 significantly differ with the negative control. Tween 80 is known to have a relatively high toxicity  
893 towards *Danio rerio*, even more than its toxicity to rodents because of its surfactant properties  
894 [76]. But in comparison to this study, Tween 80 was diluted to a lesser concentration in accordance  
895 with OECD guidelines [17] hence its concentration was found to be too negligible to cause a  
896 significant difference with the negative control. High concentrations of DMSO ( $\geq 1.5\%$  v/v)  
897 were observed to induce brachycardia and pronounced arrhythmia; but  
898 at lower concentrations, initial increase of average heart rate was  
899 observed instead [81].

900 20  $\mu\text{g/L}$  PE-MBS did not significantly differ with those in the negative control. This may  
901 be interpreted that 20  $\mu\text{g/L}$  PE-MBS was an insufficient dose that could not induce an irregularly  
902 increased bpm in comparison to the bpm observed in the negative control; however, the other  
903 higher PE-MBS concentrations induced a significantly increased heart rate in comparison to the  
904 negative control that also exhibited an increase of bpm but at a steady rate. Results may be  
905 interpreted that the higher the PE-MBS concentration, the more likely *Danio rerio* will be  
906 subjected to cardiac toxicity. It is said that exposure to polyethylene causes cardiac toxicity, a term  
907 defined by a greatly increased heart rate that may be attributed to physiological stress [112].

908 This significant increase of heart rate may also be associated with acute hypoxia  
909 contributed by adherence of polyethylene microbeads to chorionic membranes as earlier stated.  
910 One of the symptoms of hypoxia may be irregular, rapid heartbeat [113]. The study of Crail [112]  
911 also showed significant increase of heart rate at delimited oxygen concentration. That being said,  
912 means observed in 200  $\mu\text{g/L}$  PE-MBS at 72 and 96 hpf and means observed in 200  $\mu\text{g/L}$  PE-MBS  
913 at 96 hpf have exceeded the regular heart rate of a *Danio rerio* embryo. This further substantiates

914 the occurrence of irregular, rapid heart rate in the zebrafish embryo at increasing concentrations  
915 and at longer exposure to PE-MBS.

916 Tukey Kramer *post hoc* test (S22 Appendix) revealed that the heart rate of *Danio rerio*  
917 treated with different concentrations of PE-MBS significantly differed from each other at all hpf.  
918 Heart rate of zebrafish embryos increased and became more irregular upon exposure to increasing  
919 concentrations of PE-MBS, implying that cardiac toxicity due to PE-MBS may be dose dependent.

920

921

## 922 **Conclusions and recommendations**

923 The inclusion of polyethylene microbeads in personal care products such as facial washes  
924 and cosmetics has captured the attention of the scientific community due to the deleterious effects  
925 it poses on aquatic organisms. In this study, *Danio rerio* was chosen to be the representative model  
926 due to its availability, high fecundity and great similarity with the human genome. Polyethylene  
927 microbeads used in the study were based on measurements similar to actual commercial facial  
928 cleansers that contained polyethylene. Results from the Fish Embryo Acute Toxicity Test revealed  
929 that 20 µg/L did not have significant difference with the negative control in the observed  
930 parameters (i.e., embryotoxicity, teratogenicity, hatching, and heartbeat), but 200 and 2000 µg/L  
931 did, ascertaining that static exposure to high concentrations of polyethylene microbeads is  
932 embryotoxic and teratogenic to *Danio rerio* embryos. Cases of mortality may be due to the soft  
933 extraction of polyethylene microbeads using 1% DMSO that may have induced leaching of toxic  
934 additives and Endocrine-Disrupting Chemicals (EDCs). In accordance with literature outside of  
935 this study, these leached chemicals may have disrupted metabolic pathways [5, 85], alter gene  
936 integrity [85, 86], and cause cell apoptosis [87]; hence possibly resulting in *Danio rerio* toxicity

937 during embryogenesis; however, this needs a more thorough study at gene level. Adherence of  
938 polyethylene microbeads to the chorionic membrane may also have disrupted gas exchange and  
939 induced hypoxia [5]. Hypoxia may have been the underlying cause of observed premature hatching  
940 in *Danio rerio* which, in effect, increased occurrences of larval death and incidences of teratogenic  
941 abnormalities such as edema, collapsed swim bladder, and bent body axes. Rapid and irregular  
942 heart rate was also observed among *Danio rerio* embryos and may be associated with acute  
943 hypoxia and cardiac toxicity caused by polyethylene microbead exposure.

944 The result obtained from the computation for the LC<sub>50</sub> is 2455.096 µg/L and is higher than  
945 the treatment concentrations used in the study. Nonetheless, strong and urgent actions against the  
946 production of facial cleansers containing PE-MB must be implemented to reduce the microplastic  
947 pollution in bodies of water. Furthermore, investments and policy reforms on improving plastic  
948 wastes management must also be enacted to minimize microplastic leaching into the aquatic  
949 ecosystem from wastewater treatment plants. Through these concerted efforts, issues of  
950 bioaccumulation and toxicity by microplastic (e.g., microbeads) pollutants may be mitigated or  
951 prevented and consequently save the lives of both aquatic organisms and humans alike.

952 Since this study was only limited to polyethylene, different types of microbeads such as  
953 polypropylene and polyamide and different sizes ranging less than 300-355 µm may be included  
954 to broaden the study. It is also recommended that zebrafish exposed to microbeads may be further  
955 observed at the gene level to investigate the possible occurrence of mutations and other alterations  
956 such as hsp70, crim1, and pkd2 [105] that contribute to embryotoxicity and teratogenicity of the  
957 zebrafish. New biomarkers can also be searched further that can be used to monitor the health of  
958 aquatic habitat and its biota.

959

960

961 **Acknowledgments**

962           This study was made possible from the grant given by University of the Philippines  
963 National Institute of Health and the laboratory facilities UP Manila College of Arts and Sciences  
964 have provided to conduct the proper feeding and maintenance of the zebrafish. In lieu of its feeding  
965 and maintenance, it is with deepest gratitude that the researchers reach out to Sir Edgar Acantilado  
966 and Sir Maxcitar Amar for helping them with the process of the experimentation from the  
967 beginning until the end. The researchers would also like to thank Ma'am Julieta Dator Holasca  
968 from Central Luzon State University for her kind accommodation when the researchers purchased  
969 the zebrafish used in this study. Finally, the researchers would also like to extend their deepest  
970 gratitude to Ma'am Margaret L.C. De Guzman for her constant guidance and encouragement all  
971 throughout the duration of this study. Significant contributions and comments put in earlier  
972 versions of the thesis manuscript given by Ma'am Margaret L.C. De Guzman, Sir Arnold V.  
973 Hallare, and Sir Jay T. Dalet have been more than helpful in making the study more productive  
974 and more apt enough for the next researchers who want to continue this study.

975

976

977

978

979

980

981

982

## 983   **References**

- 984       1. Della Torre, C., Bergami, E., Salvati, A., Faleri, C., Cirino, P., Dawson, K. A., & Corsi, I.  
985           (2014). Accumulation and embryotoxicity of polystyrene nanoparticles at early stage of  
986           development of sea urchin embryos *Paracentrotus lividus*. *Environmental Science &*  
987           *Technology*, 48(20), 12302–12311. doi: 10.1021/es502569w
- 988       2. Australian Government Department of the Environment and Energy. (n.d.). Plastic  
989           Microbeads. Retrieved February 10, 2019, from Australian Government Department of the  
990           Environment and Energy: [http://www.environment.gov.au/protection/waste-resource-](http://www.environment.gov.au/protection/waste-resource-recovery/plastics-and-ackaging/plastic-microbeads)  
991           [recovery/plastics-and-ackaging/plastic-microbeads](http://www.environment.gov.au/protection/waste-resource-recovery/plastics-and-ackaging/plastic-microbeads)
- 992       3. Rochman, C. M., Kurobe, T., Flores, I., & Teh, S. J. (2014). Early warning signs of  
993           endocrine disruption in adult fish from the ingestion of polyethylene with and without  
994           sorbed chemical pollutants from the marine environment. *Science of the Total*  
995           *Environment*, 493, 656-661.
- 996       4. Han, E. (2016, August 16). Microbeads are leaching toxic chemicals into fish, sparking  
997           public health fears. Retrieved February 10, 2019, from *The Sydney Morning*
- 998       5. Malafaia, G., de Souza, A. M., Pereira, A. C., Gonçalves, S., da Costa Araújo, A. P.,  
999           Ribeiro, R.X., & Rocha, T. L. (2020). Developmental toxicity in zebrafish exposed to  
1000           polyethylene microplastics under static and semi-static aquatic systems. *Science of The*  
1001           *Total Environment*, 700, 134867. *Herald*: [https://www.smh.com.au/business/consumer-](https://www.smh.com.au/business/consumer-affairs/microbeads-are-leaching-toxic-chemicals-into-fish-sparking-public-health-fears-20160816-gqtlpk.html)  
1002           [affairs/microbeads-are-leaching-toxic-chemicals-into-fish-sparking-public-health-fears-](https://www.smh.com.au/business/consumer-affairs/microbeads-are-leaching-toxic-chemicals-into-fish-sparking-public-health-fears-20160816-gqtlpk.html)  
1003           [20160816-gqtlpk.html](https://www.smh.com.au/business/consumer-affairs/microbeads-are-leaching-toxic-chemicals-into-fish-sparking-public-health-fears-20160816-gqtlpk.html)
- 1004       6. Tantibanchachai, C. (2014). Teratogens. *The Embryo Project Encyclopedia*. Retrieved  
1005           from <https://embryo.asu.edu/pages/teratogens> on March 3, 2019.

- 1006 7. Environment and Climate Change Canada. (2015, July). Microbeads - A Science  
1007 Summary. Retrieved February 10, 2019, from Environment and Climate Change Canada:  
1008 [http://www.ec.gc.ca/ese-ees/adda4c5f-f397-48d5-ad17-](http://www.ec.gc.ca/ese-ees/adda4c5f-f397-48d5-ad17-63f989ebd0e5/microbeads_science%20summary_en.pdf)  
1009 [63f989ebd0e5/microbeads\\_science%20summary\\_en.pdf](http://www.ec.gc.ca/ese-ees/adda4c5f-f397-48d5-ad17-63f989ebd0e5/microbeads_science%20summary_en.pdf)
- 1010 8. Ronca, S. (2017). In Brydson's Plastics Materials (8th ed.). Oxford, United Kingdom:  
1011 Butterworth-Heinemann.
- 1012 9. Perkins, R. (2013, September 1). Advantages and Disadvantages to the use of Poly(ethene).  
1013 Retrieved February 10, 2019, from GetRevising:  
1014 [https://getrevising.co.uk/grids/advantages\\_and\\_disadvantages\\_to\\_the\\_use\\_of](https://getrevising.co.uk/grids/advantages_and_disadvantages_to_the_use_of)
- 1015 10. Jingyi, L., Liu, H., & Chen, P. (2018). Microplastics in freshwater systems: a review on  
1016 occurrence, environmental effects, and methods for microplastics detection. *Water*  
1017 *Research*, 137, 362-374. doi: <https://doi.org/10.1016/j.watres.2017.12.056>
- 1018 11. Ying Yong, C. Q., Valiyaveetill, S., & Tang, B. L. (2020). Toxicity of microplastics and  
1019 nanoplastics in mammalian systems. *International Journal of Environmental Research and*  
1020 *Public Health*, 17(1509), 1-24. doi:10.3390/ijerph17051509
- 1021 12. Braunbeck, T., & Lammer, E. (2005). Draft detailed review paper on fish embryo toxicity  
1022 assays. Department of Zoology. Heidelberg: University of Heidelberg.
- 1023 13. Keshari, V., Adeeb, B., Simmons, A. E., Simmons, T. W., & Diep, C. Q. (2016). Zebrafish  
1024 as a Model to Assess the Teratogenic Potential of Nitrite. *Journal of visualized*  
1025 *experiments: JoVE*, (108), 53615. doi: 10.3791/53615
- 1026 14. Burke, E. (2016, August 9). Why use zebrafish to study human diseases? Retrieved  
1027 February 10, 2019, from Intramural Research Program:  
1028 <https://irp.nih.gov/blog/post/2016/08/why-use-zebrafish-to-study-human-diseases>

- 1029 15. Braunbeck, T., Kais, B., Lammer, E., Otte, J., Schneider, K., Stengel, D., & Strecker, R.  
1030 (2015). The fish embryo test (FET): origin, applications, and future. *Environmental*  
1031 *Science and Pollution Research*, 22(21), 16247-16261.
- 1032 16. Schulte, C. & Nagel, R. (1994). Testing acute toxicity in the embryo of  
1033 zebrafish, *Brachydanio rerio*, as an alternative to the acute fish test: Preliminary results.  
1034 *Alternatives to laboratory animals: Atla*, 22, 12-1
- 1035 17. OECD (2013), Test No. 236: Fish Embryo Acute Toxicity (FET) Test, OECD Guidelines  
1036 for the Testing of Chemicals, Section 2, OECD Publishing, Paris, doi:  
1037 10.1787/9789264203709-en.
- 1038 18. Anderson, J. C., Park, B. J., & Palace, V. P. (2016). Microplastics in aquatic environments:  
1039 implications for Canadian ecosystems. *Environmental Pollution*, 218, 269-280.
- 1040 19. Barboza Antão, L. G., Vethaak, D., Lavorante, B., Lundebye, A.-K., & Guilhermino, L.  
1041 (2018). Marine microplastic debris: an emerging issue for food security, food safety and  
1042 human health. *Marine Pollution Bulletin*, 133, 336-348.
- 1043 20. Romero, P. (2018, June 14). *Science and Environment*. Retrieved August 31, 2019, from  
1044 Phil Star Global: [https://www.philstar.com/business/science-and-](https://www.philstar.com/business/science-and-environment/2018/06/14/1824289/legarda-bill-seeks-ban-use-microbeads)  
1045 [environment/2018/06/14/1824289/legarda-bill-seeks-ban-use-microbeads](https://www.philstar.com/business/science-and-environment/2018/06/14/1824289/legarda-bill-seeks-ban-use-microbeads)
- 1046 21. Polyethylene. (2003). *Encyclopedia of Food Sciences and Nutrition 2nd Edition*.  
1047 Polymerase chain reaction. (n.d). NCBI. Retrieved from  
1048 <https://www.ncbi.nlm.nih.gov/probe/docs/techpcr/>
- 1049 22. Beurteaux, D. (2018). Heavy metal: the new toxic danger posed by ocean plastic trash.  
1050 *Oceans Deeply*. Retrieved from

- 1051 <https://www.newsdeeply.com/oceans/articles/2018/04/03/heavy-metal-the-new-toxic->  
1052 [danger-posed-by-ocean-plastic-trash](https://www.newsdeeply.com/oceans/articles/2018/04/03/heavy-metal-the-new-toxic-)
- 1053 23. Roy, P., Hakkarainen, M., Varma, I., & Albertsson, A.C. (2011). Degradable polyethylene:  
1054 fantasy or reality. *Environmental Science and Technology*, 45(10), 4217-4227.
- 1055 24. Bushwick, S. (2015, December 24). What are microbeads and why are they illegal? Popular  
1056 Science. Retrieved from <https://www.popsoci.com/what-are-microbeads-and-why-are->  
1057 [they-illegal](https://www.popsoci.com/what-are-microbeads-and-why-are-)
- 1058 25. Pfeifer, H. (2018, January 9). The UK now has one of the world's toughest microbead bans.  
1059 Retrieved March 28, 2019, from CNN:  
1060 <https://edition.cnn.com/2018/01/09/health/microbead-ban-uk-intl/index.html>
- 1061 26. Hurley, R., Woodward, J. & Rothwell, J.J. Microplastic contamination of river beds  
1062 significantly reduced by catchment-wide flooding. *Nature Geosci* 11, 251–257 (2018). doi:  
1063 10.1038/s41561-018-0080-1
- 1064 27. Cheung, P. K., & Fok, L. (2016). Evidence of microbeads from personal care product  
1065 contaminating the sea. *Marine Pollution Bulletin*, 109(1), 582–585. doi:  
1066 10.1016/j.marpolbul.2016.05.046
- 1067 28. Tanaka, K. & Takada, H. (2016). Microplastic fragments and microbeads in digestive tracts  
1068 of planktivorous fish from urban coastal waters. *Scientific Reports*, 6(34351),1-8.  
1069 Doi:10.1038/srep34351
- 1070 29. Van Cauwenberghe, L., & Janssen, C. R. (2014). Microplastics in bivalves cultured for  
1071 human consumption. *Environmental Pollution*, 193, 65–70. doi:  
1072 10.1016/j.envpol.2014.06.010



- 1073 30. Hugh. (2018). The effect of microplastics on human health (facts & guide). Get Green  
1074 Now. Retrieved from <https://get-green-now.com/microplastics-health-guide/>
- 1075 31. Gallo, F., Fossi, C., Weber, R., Santillo, D., Sousa, J., Ingram, I., ... & Romano, D. (2018).  
1076 Marine litter plastics and microplastics and their toxic chemicals components: the need for  
1077 urgent preventive measures. *Environmental Sciences Europe*, 30(1), 13.
- 1078 32. Deng, Y., Zhang, Y., Lemos, B., & Ren, H. (2017). Tissue accumulation of microplastics  
1079 in mice and biomarker responses suggest widespread health risks of exposure. *Sci Rep*.  
1080 doi:10.1038/srep46687
- 1081 33. Wardrop, P., Shimeta, J., Nugegoda, D., Morrison, P. D., Miranda, A., Tang, M., & Clarke,  
1082 B. O. (2016). Chemical Pollutants Sorbed to Ingested Microbeads from Personal Care  
1083 Products Accumulate in Fish. *Environmental Science & Technology*, 50(7), 4037–4044.  
1084 doi:10.1021/acs.est.5b06280
- 1085 34. Jambeck, J. R., Geyer, R., Wilcox, C., Siegler, T. R., Perryman, M., Andrady, A., ... &  
1086 Law, K. L. (2015). Plastic waste inputs from land into the ocean. *Science*, 347(6223), 768-  
1087 771.
- 1088 35. Kalnasa, M. L., Lantaca, S. M. O., Boter, L. C., Flores, G. J. T., & Van Ryan Kristopher,  
1089 R. G. (2019). Occurrence of surface sand microplastic and litter in Macajalar Bay,  
1090 Philippines. *Marine Pollution Bulletin*, 149, 110521.
- 1091 36. Paler, M. K. O., Malenab, M. C. T., Maralit, J. R., & Nacorda, H. M. (2019). Plastic waste  
1092 occurrence on a beach off southwestern Luzon, Philippines. *Marine Pollution Bulletin*, 141,  
1093 416-419.
- 1094 37. Bucol, L. A., Romano, E. F., Cabcaban, S. M., Siplon, L. M. D., Madrid, G. C., Bucol, A.  
1095 A., & Polidoro, B. (2020). Microplastics in marine sediments and rabbitfish (*Siganus*

- 1096 fuscescens) from selected coastal areas of Negros Oriental, Philippines. *Marine Pollution*  
1097 *Bulletin*, 150, 110685.
- 1098 38. Chang, M. (2015). Reducing microplastics from facial exfoliating cleansers in wastewater  
1099 through treatment versus consumer product decisions. *Marine Pollution Bulletin*, 101(1),  
1100 330-333.
- 1101 39. Salaverria, L. B. (2018, June 5). Legarda to file bills to ban microplastics, single-use  
1102 plastics. Retrieved from Inquirer: [https://newsinfo.inquirer.net/997882/legarda-to-file-](https://newsinfo.inquirer.net/997882/legarda-to-file-bills-to-ban-microplastics-single-use-plastics)  
1103 [bills-to-ban-microplastics-single-use-plastics](https://newsinfo.inquirer.net/997882/legarda-to-file-bills-to-ban-microplastics-single-use-plastics)
- 1104 40. Philippine Information Agency. (2017, January 24). Groups press DOH, FDA to ban  
1105 plastic microbeads in personal care and cosmetic products . Retrieved from Science.ph:  
1106 [http://www.science.ph/full\\_story.php?key=124053:groups-press-doh-fda-to-ban-plastic-](http://www.science.ph/full_story.php?key=124053:groups-press-doh-fda-to-ban-plastic-microbeads-in-personal-care-and-cosmetic-products&type=latest)  
1107 [microbeads-in-personal-care-and-cosmetic-products&type=latest](http://www.science.ph/full_story.php?key=124053:groups-press-doh-fda-to-ban-plastic-microbeads-in-personal-care-and-cosmetic-products&type=latest)
- 1108 41. OHLL. (2020, February 27). Legarda lauds DENR ban on single use plastics. Retrieved  
1109 from Philippine Information Agency: <https://pia.gov.ph/news/articles/1035385>
- 1110 42. Gerlach G., Morales, E., & Wingert, R (2015). Microbead implantation in the zebrafish  
1111 embryo. *Journal of Visualized Experiments*. doi: 10.3791/52943
- 1112 43. JoVE Science Education Database. Biology II: Mouse, Zebrafish, and Chick. Zebrafish  
1113 Breeding and Embryo Handling. JoVE, Cambridge, MA, (2020).
- 1114 44. Sharpe, S. (2019, June 16). Zebra Danio (zebrafish). The Spruce Pets. Retrieved  
1115 from <https://www.thesprucepets.com/zebra-danio-1378473>
- 1116 45. Lieschke, G. J., & Currie, P. D. (2007). Animal models of human disease: zebrafish swim  
1117 into view. *Nature Reviews Genetics*, 8(5), 353–367. doi: 10.1038/nrg2091

- 1118 46. Rahman Khan, F., & Sulaiman Alhewairini, S. (2019). Zebrafish (*Danio rerio*) as a Model  
1119 Organism. *Current Trends in Cancer Management*. doi: 10.5772/intechopen.81517
- 1120 47. Chung, W. (n.d). Teratogens and their Effects. Retrieved from  
1121 <http://www.columbia.edu/itc/hs/medical/humandev/2004/Chpt23-Teratogens.pdf>
- 1122 48. Embryotoxicity. (n.d.) Miller-Keane Encyclopedia and Dictionary of Medicine, Nursing,  
1123 and Allied Health, Seventh Edition. (2003). Retrieved February 5 2020 from  
1124 <https://medical-dictionary.thefreedictionary.com/embryotoxicity>
- 1125 49. Oehlmann, J.r., Schulte-Oehlmann, U., Kloas, W., Jagnytsch, O., Lutz, I., Kusk, K.O.,  
1126 Wollenberger, L., Santos, E.M., Paull, G.C., Van Look, K.J.W., Tyler, C.R. (2009). A  
1127 critical analysis of the biological impacts of plasticizers on wildlife. *Philosophical*  
1128 *Transactions of the Royal Society B: Biological Sciences*, volume 364, pp. 2047–2062.
- 1129 50. Andersson, E. (2014). Micro plastics in the oceans and their effect on the marine fauna.  
1130 Retrieved from [https://stud.epsilon.slu.se/6634/7/andersson\\_e\\_140904.pdf](https://stud.epsilon.slu.se/6634/7/andersson_e_140904.pdf)
- 1131 51. Batel, A., Borchert, F., Reinwald, H., Erdinger, L., & Braunbeck, T. (2018). Microplastic  
1132 accumulation patterns and transfer of benzo[a]pyrene to adult zebrafish (*Danio rerio*) gills  
1133 and zebrafish embryos. *Environmental Pollution*, 235, 918–930.  
1134 doi:10.1016/j.envpol.2018.01.028
- 1135 52. Qiang, L., & Cheng, J. (2019). Exposure to microplastics decreases swimming competence  
1136 in larval zebrafish (*Danio rerio*). *Ecotoxicology and Environmental Safety*, 176, 226–233.  
1137 doi: 10.1016/j.ecoenv.2019.03.088
- 1138 53. Cormier B, Batel A, Cachot J, Bégout M-L, Braunbeck T, Cousin X and Keiter SH (2019)  
1139 Multi-laboratory hazard assessment of contaminated microplastic particles by means of

- 1140 enhanced fish embryo test with the zebrafish (*Danio rerio*). *Front. Environ. Sci.* 7:135. doi:  
1141 10.3389/fenvs.2019.00135
- 1142 54. Au, Sarah, "Toxicity of Microplastics to Aquatic Organisms" (2017). All Dissertations.  
1143 1877.
- 1144 55. Chen, Q., Yin, D., Jia, Y., Schiwy, S., Legradi, J., Yang, S., & Hollert, H. (2017). Enhanced  
1145 uptake of BPA in the presence of nanoplastics can lead to neurotoxic effects in adult  
1146 zebrafish. *Science of the Total Environment*, 609, 1312-1321.
- 1147 56. Nobre, C. R., Santana, M. F. M., Maluf, A., Cortez, F. S., Cesar, A., Pereira, C. D. S., &  
1148 Turra, A. (2015). Assessment of microplastic toxicity to embryonic development of the sea  
1149 urchin *Lytechinus variegatus* (Echinodermata: Echinoidea). *Marine Pollution Bulletin*,  
1150 92(1-2), 99-104.
- 1151 57. Träber, N., Uhlmann, K., Girardo, S., Kesavan, S., Wagner, K., Friedrichs, J., et al. (2019).  
1152 Polyacrylamide bead sensors for in vivo quantification of cell-scale stress in zebrafish  
1153 development. *Scientific Reports*, 9, 1-14. doi:10.1038/s41598-019-53425-6
- 1154 58. Lei, L., Wu, S., Lu, S., Liu, M., Song, Y., Fu, Z., et al. (2018). Microplastic particles cause  
1155 intestinal damage and other adverse effects in zebrafish *Danio rerio* and nematode  
1156 *Caenorhabditis elegans*. *Science Total Environment*, 619-620.
- 1157 59. Arellano-Aguilar, O. et al. (2015). Use of zebrafish embryo toxicity test for risk assessment  
1158 purpose: case study. *Journal of Fisheries Sciences*. doi: 10.1371/Journal.pone.0187590
- 1159 60. Gulden, M., Mörchel, S., & Seibert, H. (2005). Comparison of mammalian and fish cell  
1160 line cytotoxicity: impact of endpoint and exposure duration. *Aquatic Toxicology*, 71(3),  
1161 229-236.

- 1162 61. Ochokwu, I. J., Apollos, T. G., & Oshoke, J. O. (2015). Effect of egg and sperm quality in  
1163 successful fish breeding. *IOSR Journal of Agriculture and Veterinary Science*, 2, 48-57.
- 1164 62. Cospheric (2017). Protocol for Preparing Tween Solutions of Hydrophobic Polyethylene  
1165 Microspheres. Retrieved from  
1166 [https://www.cospheric.com/tween\\_solutions\\_density\\_marker\\_beads.htm](https://www.cospheric.com/tween_solutions_density_marker_beads.htm)
- 1167 63. Lu, Y., Zhang, Y., Deng, Y., Jiang, W., Zhao, Y., Geng, J., ... & Ren, H. (2016). Uptake  
1168 and accumulation of polystyrene microplastics in zebrafish (*Danio rerio*) and toxic effects  
1169 in liver. *Environmental Science & Technology*, 50(7), 4054-4060.
- 1170 64. Ruhl, N., McRobert, S. P., & Currie, W. J. (2009). Shoaling preferences and the effects of  
1171 sex ratio on spawning and aggression in small laboratory populations of zebrafish (*Danio*  
1172 *rerio*). *Lab animal*, 38(8), 264-269.
- 1173 65. Organisation for Economic Co-operation and Development. (2008, November 21). OECD.  
1174 Retrieved from OECD:  
1175 [http://www.oecd.org/officialdocuments/publicdisplaydocumentpdf/?cote=env/jm/mono\(2](http://www.oecd.org/officialdocuments/publicdisplaydocumentpdf/?cote=env/jm/mono(2)  
1176 [008\)28&doclanguage=en](http://www.oecd.org/officialdocuments/publicdisplaydocumentpdf/?cote=env/jm/mono(2008)28&doclanguage=en)
- 1177 66. Sharpe, S. (2020, June 16). Methylene Blue. Retrieved from The Spruce Pets:  
1178 <https://www.thesprucepets.com/methylene-blue-1379926>
- 1179 67. Westerfield, M. (2000). *The zebrafish book: a guide for the laboratory use of zebrafish*.  
1180 [http://zfin.org/zf\\_info/zfbook/zfbk.html](http://zfin.org/zf_info/zfbook/zfbk.html).
- 1181 68. Scheil, V., Kienle, C., Osterauer, R., Gerhardt, A., & Köhler, H. R. (2009). Effects of 3, 4-  
1182 dichloroaniline and diazinon on different biological organisation levels of zebrafish (*Danio*  
1183 *rerio*) embryos and larvae. *Ecotoxicology*, 18(3), 355-363.

- 1184 69. Strykowski, J. L., & Schech, J. M. (2015). Effectiveness of recommended euthanasia  
1185 methods in larval zebrafish (*Danio rerio*). *Journal of the American Association for*  
1186 *Laboratory Animal Science*, 54(1), 81-84.
- 1187 70. Borski, R., & Hodson, R. (2003). Fish Research and the Institutional Animal Care and Use  
1188 Committee. *ILAR*, 44 (4), 286-294.
- 1189 71. Aquarium Adviser. (2019, March 29). How to Replace Water in your Fish Tank? Retrieved  
1190 October 1, 2019 from Aquarium Adviser: [https://aquariumadviser.com/how-to-replace-](https://aquariumadviser.com/how-to-replace-water-in-your-fish-tank/)  
1191 [water-in-your-fish-tank/](https://aquariumadviser.com/how-to-replace-water-in-your-fish-tank/)
- 1192 72. Lillicrap, A., Embry, M., Lee, L., & Leonard, M. (2016, August 11). Is the Fish Embryo  
1193 Acute Toxicity Test Under Threat? A Perspective from the SETAC Global Animal  
1194 Alternatives Advisory Group. *Globe: Environmental Quality Through Science*, 17(8).
- 1195 73. Lipsitch, M., Tchetgen, E. T., & Cohen, T. (2010). Negative controls: a tool for detecting  
1196 confounding and bias in observational studies. *Epidemiology (Cambridge, Mass.)*, 21(3),  
1197 383.
- 1198 74. McLeod, S. (2019, July 30). Extraneous Variable. Retrieved from Simply Psychology:  
1199 <https://www.simplypsychology.org/extraneous-variable.html>
- 1200 75. Mendis, J. C., Tennakoon, T. K., & Jayasinghe, C. D. (2018). Zebrafish embryo toxicity  
1201 of a binary mixture of pyrethroid insecticides: d-tetramethrin and cyphenothrin. *Journal of*  
1202 *toxicology*, 2018.
- 1203 76. Ali, S., Mil, H. G. J. van, & Richardson, M. K. (2011). Large-Scale Assessment of the  
1204 Zebrafish Embryo as a Possible Predictive Model in Toxicity Testing. *PLoS ONE*, 6(6),  
1205 e21076. doi:10.1371/journal.pone.0021076

- 1206 77. Reimers, M. J., Flockton, A. R., & Tanguay, R. L. (2004). Ethanol-and acetaldehyde-  
1207 mediated developmental toxicity in zebrafish. *Neurotoxicology and teratology*, 26(6), 769-  
1208 781.
- 1209 78. Henn, K., & Braunbeck, T. (2011). Dechoriation as a tool to improve the fish embryo  
1210 toxicity test (FET) with the zebrafish (*Danio rerio*). *Comparative Biochemistry and*  
1211 *Physiology Part C: Toxicology & Pharmacology*, 153(1), 91-98.
- 1212 79. Bakalinsky, A. T., & Penner, M. H. (2003). ALCOHOL Properties and Determination.
- 1213 80. El Mas, M., Abdel-Rahman, A., 2003. Effects of chronic ethanol feeding on Clonidine-  
1214 evoked reductions in blood pressure, heart rate, and their variability: time-domain analysis.  
1215 *J. Pharmacol. Exp. Therapeut.* 306, 271–278.
- 1216 81. Hallare, A., Nagel, K., Köhler, H., & Tribskom, R. (2006). Comparative embryotoxicity  
1217 and proteotoxicity of three carrier solvents to zebrafish (*Danio rerio*) embryos.  
1218 *Ecotoxicology Environmental Safety*, 63(3), 378-88.
- 1219 82. Varma, R. K., Kaushal, R., Junnarkar, A. Y., Thomas, G. P., Naidu, M. U., Singh, P. P., ...  
1220 & Shridhar, D. R. (1985). Polysorbate 80: a pharmacological study. *Arzneimittel-*  
1221 *Forschung*, 35(5), 804-808.
- 1222 83. Torres-Arraut, E., Singh, S., & Pickoff, A. S. (1984). Electrophysiologic effects of Tween  
1223 80 in the myocardium and specialized conduction system of the canine heart. *Journal of*  
1224 *electrocardiology*, 17(2), 145-151.
- 1225 84. McCollum, C. W., Ducharme, N. A., Bondesson, M., & Gustafsson, J. A. (2011).  
1226 Developmental toxicity screening in zebrafish. *Birth Defects Research Part C: Embryo*  
1227 *Today: Reviews*, 93(2), 67-114

- 1228 85. Ortiz-Villanueva, E., Jaumot, J., Martínez, R., Navarro-Martín, L., Piña, B., & Tauler, R.  
1229 (2018). Assessment of endocrine disruptors effects on zebrafish (*Danio rerio*) embryos by  
1230 untargeted LC-HRMS metabolomic analysis. *Science of the Total Environment*, 635, 156-  
1231 166.
- 1232 86. Yang, J., & Chan, K. M. (2015). Evaluation of the toxic effects of brominated compounds  
1233 (BDE-47, 99, 209, TBBPA) and bisphenol A (BPA) using a zebrafish liver cell line, ZFL.  
1234 *Aquatic Toxicology*, 159, 138-147.
- 1235 87. Benachour, N., & Aris, A. (2009). Toxic effects of low doses of Bisphenol-A on human  
1236 placental cells. *Toxicology and applied pharmacology*, 241(3), 322-328.
- 1237 88. Kim, K. T., & Tanguay, R. L. (2014). The role of chorion on toxicity of silver nanoparticles  
1238 in the embryonic zebrafish assay. *Environmental health and toxicology*, 29.
- 1239 89. Burggren, W. W., & Pinder, A. W. (1991). Ontogeny of cardiovascular and respiratory  
1240 physiology in lower vertebrates. *Annual Review of Physiology*, 53(1), 107-135.
- 1241 90. Kuiper, R. V., Van den Brandhof, E. J., Leonards, P. E. G., Van der Ven, L. T. M., Wester,  
1242 P. W., & Vos, J. G. (2007). Toxicity of tetrabromobisphenol A (TBBPA) in zebrafish  
1243 (*Danio rerio*) in a partial life-cycle test. *Archives of Toxicology*, 81(1), 1-9
- 1244 91. Rifes, P., Carvalho, L., Lopes, C., Andrade, R. P., Rodrigues, G., Palmeirim, I., &  
1245 Thorsteinsdóttir, S. (2007). Redefining the role of ectoderm in somitogenesis: a player in  
1246 the formation of the fibronectin matrix of presomitic mesoderm. *Development*, 134(17),  
1247 3155-3165.
- 1248 92. Ishimatsu K, Takamatsu A, Takeda H. 2010. Emergence of traveling waves in the zebrafish  
1249 segmentation clock. *Development* 137:1595–1599.



- 1250 93. Li, J., Zhang, Y., Liu, K., He, Q., Sun, C., Han, J., ... & Tian, Q. (2018). Xiaoaiping induces  
1251 developmental toxicity in zebrafish embryos through activation of ER stress, apoptosis and  
1252 the Wnt pathway. *Frontiers in Pharmacology*, 9, 1250.
- 1253 94. Kimmel, C. B., Ballard, W. W., Kimmel, S. R., Ullmann, B., & Schilling, T. F. (1995).  
1254 Stages of embryonic development of the zebrafish. *Developmental Dynamics*, 203(3), 253-  
1255 310.
- 1256 95. Ord, J. (2019). Ionic stress prompts premature hatching of zebrafish (*Danio rerio*) embryos.  
1257 *Fishes*, 4(1), 20.
- 1258 96. Ali, S., Aalders, J., & Richardson, M. K. (2014). Teratological effects of a panel of sixty  
1259 water-soluble toxicants on zebrafish development. *Zebrafish*, 11(2), 129–141.  
1260 doi:10.1089/zeb.2013.0901
- 1261 97. Hallare, A. V., Köhler, H. R., & Triebkorn, R. (2004). Developmental toxicity and stress  
1262 protein responses in zebrafish embryos after exposure to diclofenac and its solvent, DMSO.  
1263 *Chemosphere*, 56(7), 659-666.
- 1264 98. Strecker, R., Seiler, T. B., Hollert, H., & Braunbeck, T. (2011). Oxygen requirements of  
1265 zebrafish (*Danio rerio*) embryos in embryo toxicity tests with environmental samples.  
1266 *Comparative Biochemistry and Physiology Part C: Toxicology & Pharmacology*, 153(3),  
1267 318-327.
- 1268 99. Brannen, K. C., Panzica-Kelly, J. M., Danberry, T. L., & Augustine-Rauch, K. A. (2010).  
1269 Development of a zebrafish embryo teratogenicity assay and quantitative prediction model.  
1270 *Birth Defects Research Part B: Developmental and Reproductive Toxicology*, 89(1), 66–  
1271 77. doi: 10.1002/bdrb.20223

- 1272 100. Loucks, E., & Ahlgren, S. (2012). Assessing teratogenic changes in a zebrafish  
1273 model of fetal alcohol exposure. *Journal of Visualized Experiments: JoVE*, (61), 3704. doi:  
1274 10.3791/3704
- 1275 101. Maes J, Verlooy L, Buenafe OE, de Witte PA, Esguerra CV, Crawford AD. 2012.  
1276 Evaluation of 14 organic solvents and carriers for screening appli- cations in zebrafish  
1277 embryos and larvae. *PLoS ONE* 7:e43850.
- 1278 102. Ziajahromi, S., Kumar, A., Neale, P. A., & Leusch, F. D. L. (2018).  
1279 Environmentally relevant concentrations of polyethylene microplastics negatively impact  
1280 the survival, growth and emergence of sediment-dwelling invertebrates. *Environmental*  
1281 *Pollution*, 236, 425–431. doi:10.1016/j.envpol.2018.01.094
- 1282 103. Shang, E. H. H., & Wu, R. S. S. (2004). Aquatic hypoxia is a teratogen and affects  
1283 fish embryonic development. *Environmental Science & Technology*, 38(18), 4763–4767.  
1284 doi:10.1021/es0496423
- 1285 104. Mak, C. W., Ching-Fong Yeung, K., & Chan, K. M. (2019). Acute toxic effects of  
1286 polyethylene microplastic on adult zebrafish. *Ecotoxicology and Environmental Safety*,  
1287 182, 109442. doi:10.1016/j.ecoenv.2019.109442
- 1288 105. Schottenfeld, J., Sullivan-Brown, J., & Burdine, R. D. (2007). Zebrafish curly up  
1289 encodes a Pkd2 ortholog that restricts left-side-specific expression of southpaw.  
1290 *Development*, 134(8), 1605–1615. doi:10.1242/dev.02827
- 1291 106. Xiyuan Z, Fink R.H.A., and Mosqueira M. (2017). NO-sGC pathway modulates  
1292 Ca<sup>2+</sup> release and muscle contraction in zebrafish skeletal muscle. *Front. Physiol.*, 8(607),  
1293 1. doi: 10.3389/fphys.2017.00607

- 1294 107. Kaleuff, A.V., 2017. The rights and wrongs of zebrafish: Behavioral phenotyping  
1295 of zebrafish. Springer, Slidell, USA.
- 1296 108. Bertola, L., Schoonheere, E., Wilms, I., Kabli, S., Alia, A., Groot, H., & Bagowski,  
1297 C. (2011). Effects of hypoxia on buoyancy control and the development of lordosis in  
1298 physostomous and physoclistous fish species. *Biosciences*, 1-7.
- 1299 109. De Luca, E., Zaccaria, G. M., Hadhoud, M., Rizzo, G., Ponzini, R., Morbiducci,  
1300 U., & Santoro, M. M. (2014). ZebraBeat: a flexible platform for the analysis of the cardiac  
1301 rate in zebrafish embryos. *Scientific Reports*, 4, 4898. doi: 10.1038/srep04898
- 1302 110. Sarmah, S., & Marrs, J. A. (2017). Embryonic ethanol exposure affects early and  
1303 late-added cardiac precursors and produces long-lasting heart chamber defects in zebrafish.  
1304 *Toxics*, 5(4), 35. doi: 10.3390/toxics5040035
- 1305 111. Maiwald, S., 1997. Wirkung von Lösungsvermittlern und lipophilen Substanzen  
1306 auf die Embryonalentwicklung des Zebraärblings (*Brachydanio rerio*). M.Sc. Thesis, TU  
1307 Dresden, Germany
- 1308 112. Crail, K. (2019). Effects of acute hypoxia on *Danio rerio*. The University of Akron,  
1309 2-19.
- 1310 113. Kopp, R., Bauer, I., Ramalingam, A., Egg, M., & Schwerte, T. (2014). Prolonged  
1311 hypoxia increases survival even in zebrafish (*Danio rerio*) showing cardiac arrhythmia.  
1312 *PLoS ONE*, 9(2), e89099. doi: 10.1371/journal.pone.0089099
- 1313
- 1314
- 1315
- 1316

1317

1318

1319

1320

1321 **Figure Captions**

1322 **Fig 1. Lethal effects of PE-MBS on *Danio rerio* embryos within 96 hour exposure to**  
1323 **different concentrations.**

1324 Data shown is based on the average of three replicates performed in the study. Error bars indicate  
1325 standard error. Single-asterisk indicates a statistically significant difference of cumulative  
1326 mortality between *Danio rerio* ( $p < 0.05$ ). (\*: $p < 0.05$ ).

1327 **Fig 2. Relative percentages of toxicological endpoints observed in deceased *Danio rerio* at**  
1328 **96 hpf.**

1329 Percentage shown is based on the average of three replicates performed in the study.

1330 **Fig 3. Toxicological endpoints observed in *Danio rerio*.**

1331 (A) normal development of *Danio rerio* at 48 hpf observed in the negative control (RW), 0.01%  
1332 Tween 80, 80% DMSO, and 20  $\mu\text{g/L}$  PE-MBS. A. Embryo demonstrates eye bud (Eb), chorion  
1333 (Ch), yolk (y), somites (s), and tail (t). 3 of the 4 toxicological endpoints denoting mortality: (B)  
1334 lack of somite formation (*arrow*), (C) coagulation of eggs, and (D) non-detachment of tail  
1335 (*arrow*) observed primarily in the positive control (5% ethanol), 200  $\mu\text{g/L}$  PE-MBS, and 2000  
1336  $\mu\text{g/L}$  PE-MBS.

1337 **Fig 4. Concentration-Mortality curve in FET of *Danio rerio* treated with PE-MBS at 96**  
1338 **hpf.**

1339 Error bars indicate standard error. Single-asterisk indicates a statistically significant difference of  
1340 cumulative mortality between *Danio rerio* at 96 hpf ( $p < 0.05$ ). (\*: $p < 0.05$ ).

1341 **Fig 5. Probit analysis for the estimation of LC<sub>50</sub> values of *Danio rerio* exposed to PE-MBS.**

1342 Analyzed results showed that the LC<sub>50</sub> is 2455.096 µg/L with 95% confidence limits. Error bars  
1343 indicate standard error.

1344 **Fig 6. Cumulative number of hatched *Danio rerio* within 96 hour exposure to different  
1345 treatments.**

1346 Data shown is based on the average of three replicates performed in the study. Error bars indicate  
1347 standard error. Single-asterisk indicates a statistically significant difference of cumulative  
1348 hatching between *Danio rerio* ( $p < 0.05$ ). (\*: $p < 0.05$ ).

1349 **Fig 7. Total number of malformations observed in *Danio rerio* for each treatment at 144  
1350 hpf.**

1351 Error bars indicate standard error. Single-asterisk indicates a statistically significant difference of  
1352 total number of malformations between *Danio rerio* at 144 hpf ( $p < 0.05$ ). (\*: $p < 0.05$ ).

1353 **Fig 8. Relative percentages of malformations observed in *Danio rerio* for each treatment at  
1354 144 hpf.**

1355 Percentage shown is based on the average of three replicates performed in the study.

1356 **Fig 9. Fresh mount of *Danio rerio* at 144 hpf showing collapse of the swim bladder. (A)**

1357 shows normal development of the swim bladder (swb) observed in the negative control (RW),

1358 0.01% Tween 80 % DMSO, and 20 µg/L PE-MBS. (B) shows collapsed swim bladder (cswb)

1359 observed in the following treatments of increasing order: the positive control (5% ethanol), 200

1360 µg/L PE-MBS, and 2000 µg/L PE-MBS.

1361 **Fig 10. Fresh mount of *Danio rerio* at 144 hpf with different severities of yolk sac and**  
1362 **pericardial edema.**

1363 (A) shows the normal development observed in the negative control (RW) with normal yolk sac  
1364 (ys) and pericardium (p). (B) exhibits mild yolk sac edema (myse) observed in treatments 0.01%  
1365 Tween 80 and 1% DMSO and mild pericardial edema (mpe). (C) shows severe yolk sac (syce)  
1366 and pericardial edema (spe) both observed in 200µg/L PE-MBS, 2000µg/L PE-MBS, and 5%  
1367 ethanol with the last two respective treatment and control groups exhibiting the most incidents of  
1368 edema.

1369 **Fig 11. Fresh mount of *Danio rerio* at 144 hpf showing bent body axis and tail curvature.**

1370 (A) exhibits bent body axis (bba). (B) exhibits tail curvature (tc). Both malformations were  
1371 observed in the positive control (5% ethanol) and in treatments, 200 and 2000 µg/L PE-MBS.  
1372 Bent body axis was observed in the 20 µg/L PE-MBS.

1373 **S12 Fig. Heart rate (bpm) observed in *Danio rerio* for each treatment.**

1374 Data shown is based on the average of three replicates performed in the study. Error bars indicate  
1375 standard error. Single-asterisk indicates a statistically significant difference of heart rate between  
1376 *Danio rerio* ( $p < 0.05$ ). (\*: $p < 0.05$ ).

1377

1378

1379

1380 **Supporting Information**

1381 **S1 Table. Experimental setup for the Fish Embryo Acute Toxicity Test.**

1382 **S1 Appendix. Number of fertilized and unfertilized eggs collected during spawning.**

- 1383 **S2 Appendix. Toxicological endpoints observed in *Danio rerio* for each trial within the 96**  
1384 **hour exposure.**
- 1385 **S3 Appendix. Cumulative number of deceased *Danio rerio* for each trial within the 96 hour**  
1386 **exposure.**
- 1387 **S4 Appendix. Cumulative number of deceased *Danio rerio* embryo and larvae for each trial**  
1388 **at the end of the-96 hour exposure.**
- 1389 **S5 Appendix. Cumulative number of hatched *Danio rerio* for each trial within the 96 hour**  
1390 **exposure.**
- 1391 **S6 Appendix. Average number of malformations observed in *Danio rerio* embryos for each**  
1392 **trial at 144 hpf.**
- 1393 **S7 Appendix. Average number of each kind of malformation observed in *Danio rerio* for**  
1394 **each trial at 144 hpf.**
- 1395 **S8 Appendix. Average bpm of *Danio rerio* embryos exposed for each trial within the 96**  
1396 **hour exposure.**
- 1397 **S9 Appendix. Single factor analysis of variance for the effect of different treatments to the**  
1398 **mortality of *Danio rerio* within the 96 hour exposure .**
- 1399 **S10 Appendix. Dunnet's test for cumulative mortality of *Danio rerio* exposed to different**  
1400 **treatments within the 96 hour exposure with 95% confidence intervals.**
- 1401 **S11 Appendix. Tukey HSD/Kramer test for cumulative mortality of *Danio rerio* treated**  
1402 **with varying concentrations of PE-MBS within the 96 hour exposure.**
- 1403 **S12 Appendix. Calculation of LC<sub>50</sub> of PE-MB using probit analysis with 95% confidence**  
1404 **limits**

- 1405 **S13 Appendix. Single factor analysis of variance for the effect of different treatments to the**  
1406 **cumulative hatching of *Danio rerio* within the 96 hour exposure.**
- 1407 **S14 Appendix. Dunnet's test for cumulative hatching of *Danio rerio* exposed to different**  
1408 **treatments within the 96 hour exposure with 95% confidence intervals.**
- 1409 **S15 Appendix. Tukey HSD/Kramer test for cumulative hatching of *Danio rerio* treated**  
1410 **with varying concentrations of PE-MBS within the 96 hour exposure.**
- 1411 **S16 Appendix. Kruskal-Wallis Test for the malformations observed in *Danio rerio* exposed**  
1412 **to different treatments at 144 hpf.**
- 1413 **S17 Appendix. Dunn's test for malformations observed in *Danio rerio* embryos at 144 hpf**  
1414 **to different treatments ( $p < 0.05$ ).**
- 1415 **S18 Appendix. Single factor analysis of variance for the effect of varying concentrations of**  
1416 **PE-MBS to the number of malformations observed in *Danio rerio* at 144 hpf.**
- 1417 **S19 Appendix. Tukey HSD/Kramer test for malformations of *Danio rerio* treated with**  
1418 **varying concentrations of PE-MBS at 144 hpf.**
- 1419 **S20 Appendix. Single factor analysis of variance for the effect of different treatments to the**  
1420 **heart rate (bpm) of *Danio rerio* within the 96 hour exposure.**
- 1421 **S21 Appendix. Dunnet's test for the heart rate (bpm) in *Danio rerio* exposed to different**  
1422 **treatments within the 96 hour exposure with 95% confidence intervals.**
- 1423 **S22 Appendix. Tukey HSD/Kramer test for the heart rate (bpm) of *Danio rerio* treated**  
1424 **with varying concentrations of PE-MBS within the 96 hour exposure.**
- 1425 **S23 Appendix. Institutional Animal Care and Use Committee Letter of Approval.**



bioRxiv preprint doi: <https://doi.org/10.1101/2020.09.16.299438>; this version posted September 16, 2020. The copyright holder for this preprint (which was not certified by peer review) is the author/funder, who has granted bioRxiv a license to display the preprint in perpetuity. It is made available under aCC-BY 4.0 International license.

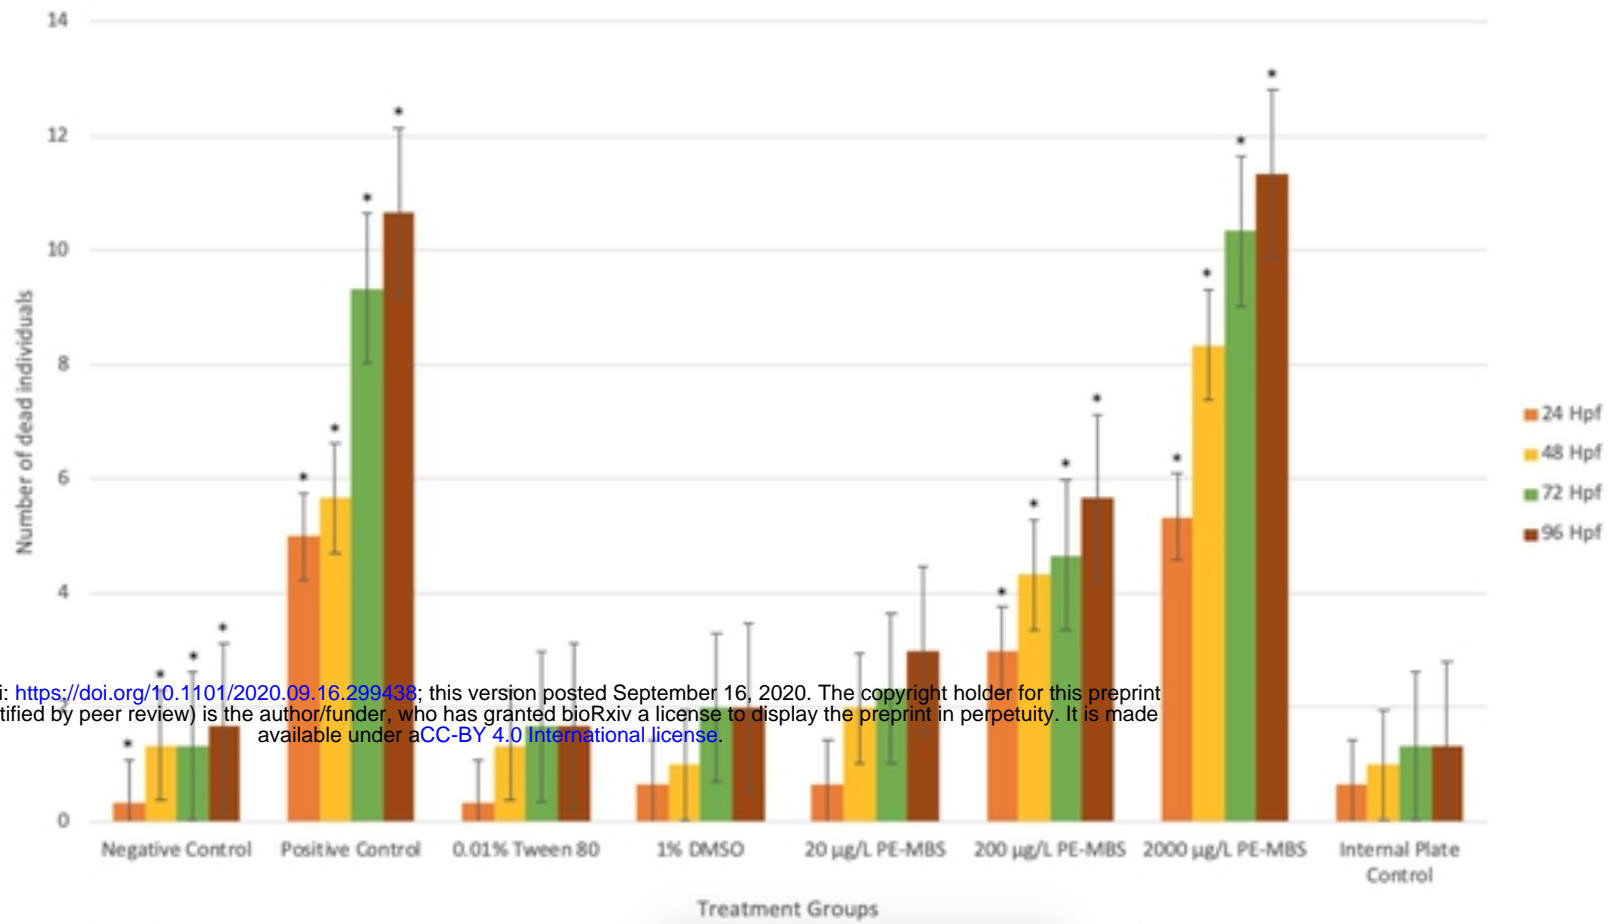

**Fig 1. Lethal effects of PE-MBS on *Danio rerio* embryos within 96 hour exposure to different concentrations.**

Data shown is based on the average of three replicates performed in the study. Error bars indicate standard error. Single-asterisk indicates a statistically significant difference of cumulative mortality between *Danio rerio* ( $p < 0.05$ ). (\*: $p < 0.05$ ).

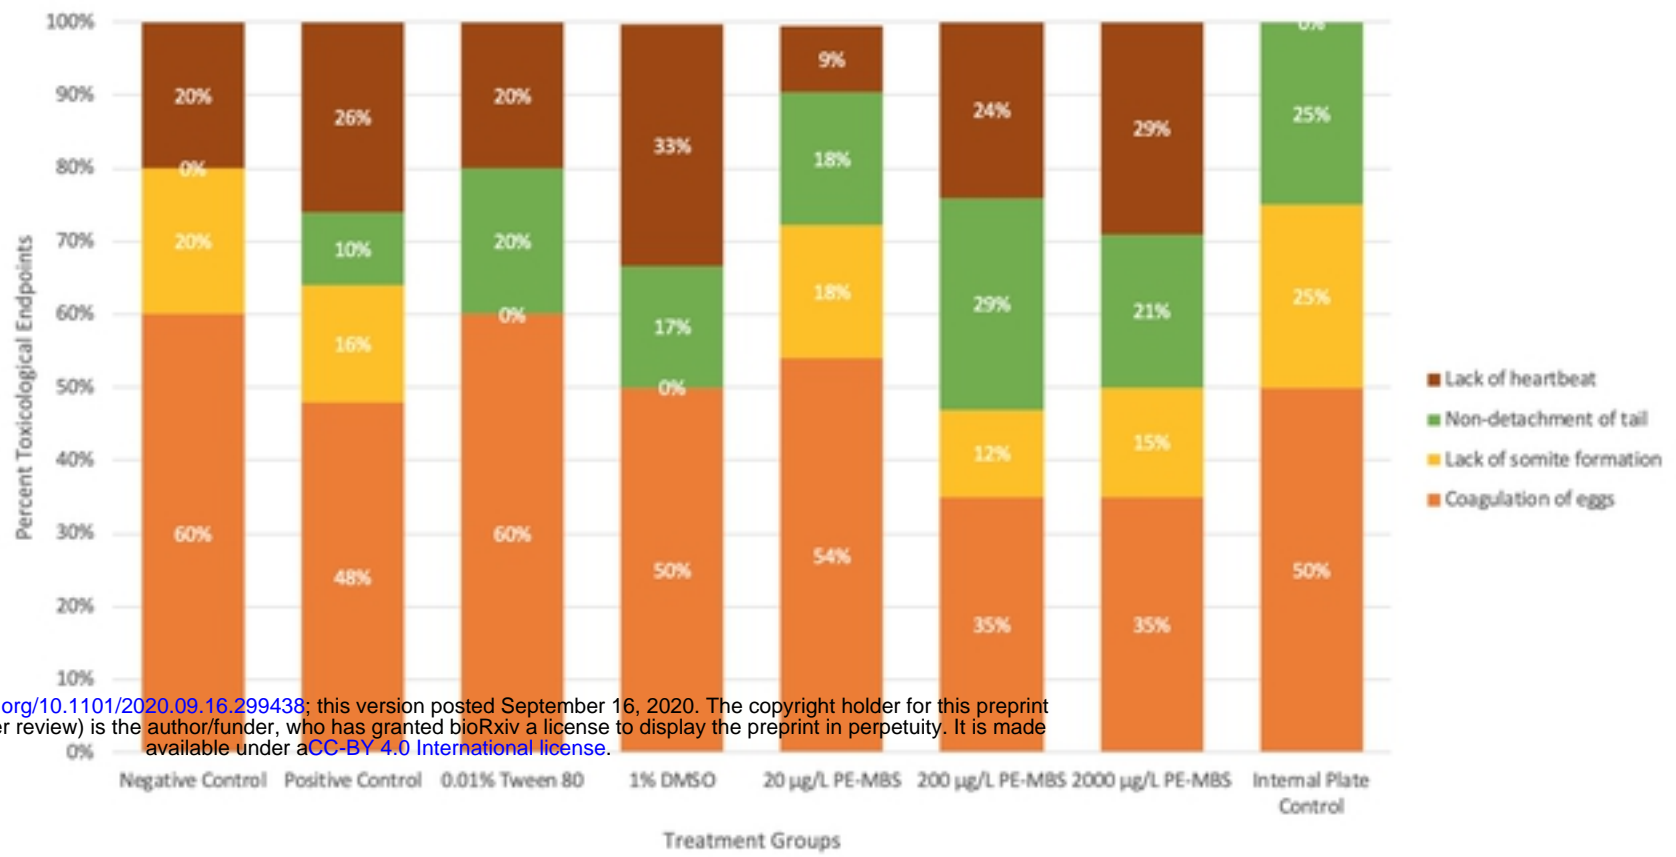

bioRxiv preprint doi: <https://doi.org/10.1101/2020.09.16.299438>; this version posted September 16, 2020. The copyright holder for this preprint (which was not certified by peer review) is the author/funder, who has granted bioRxiv a license to display the preprint in perpetuity. It is made available under aCC-BY 4.0 International license.

**Fig 2. Relative percentages of toxicological endpoints observed in deceased *Danio rerio* at 96 hpf.**

Percentage shown is based on the average of three replicates performed in the study.

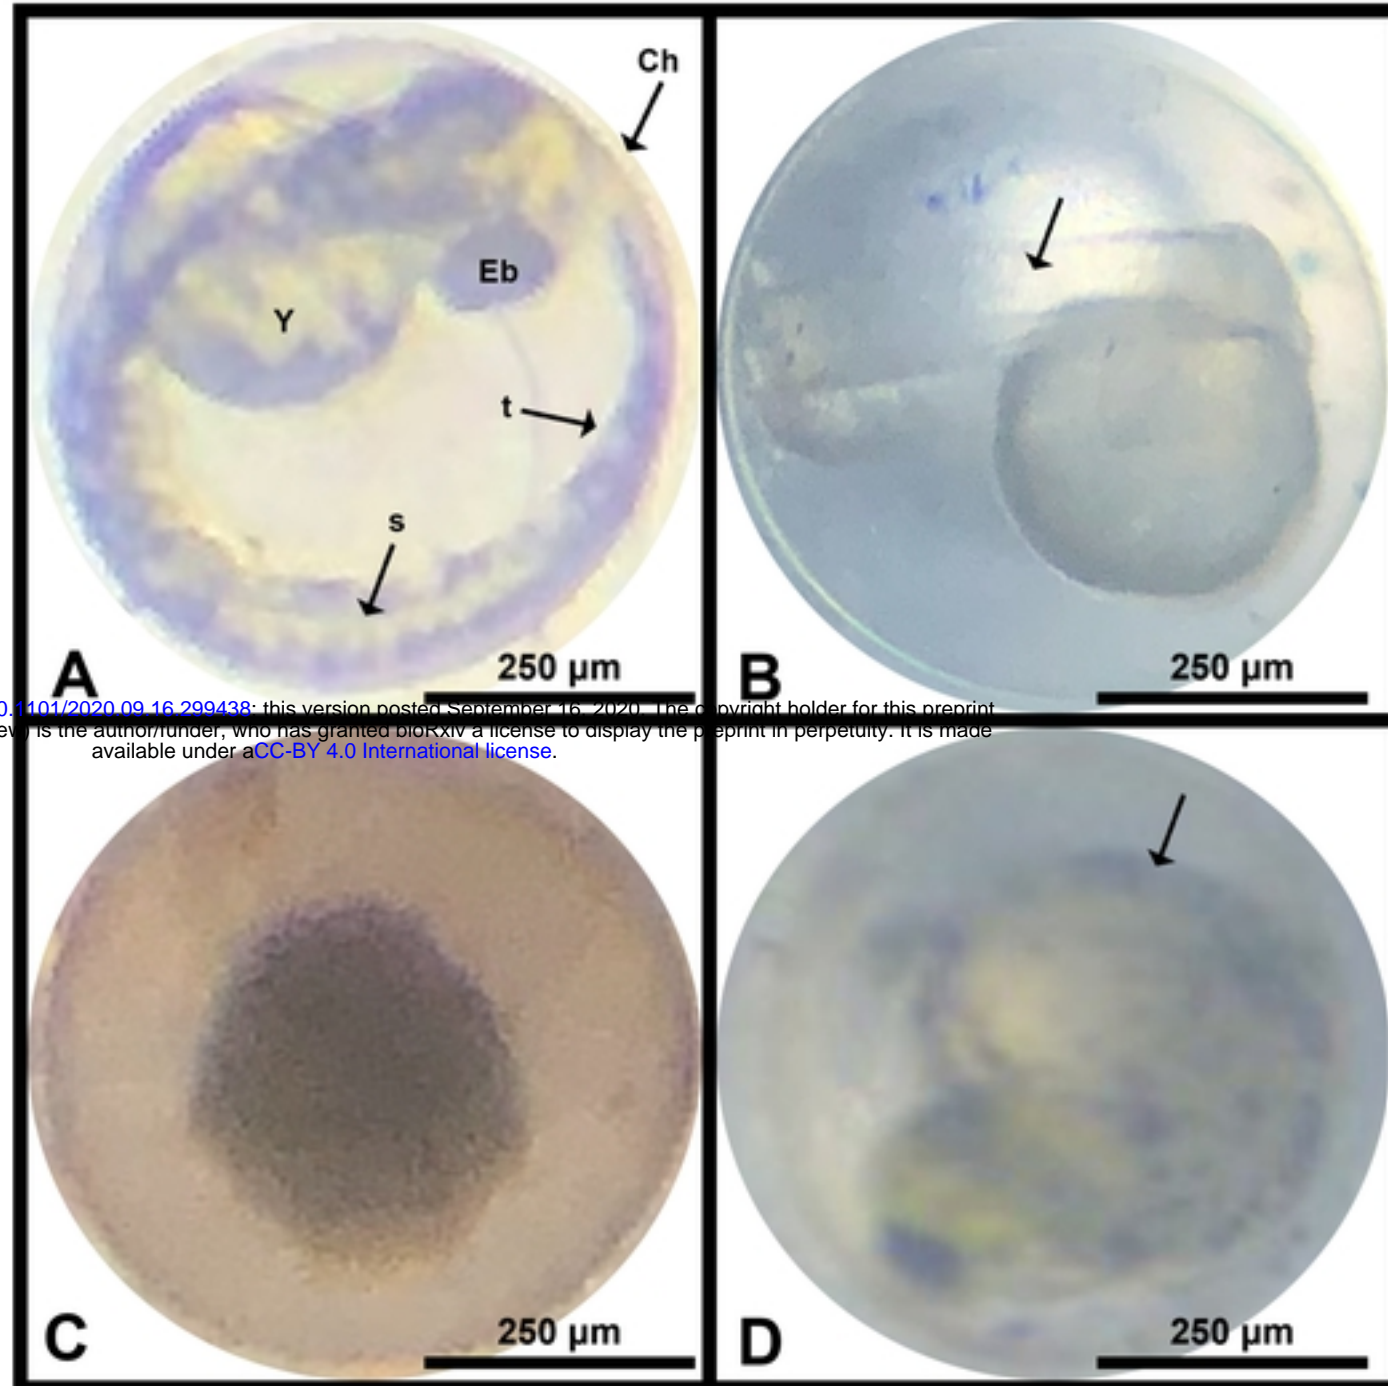

**Fig 3. Toxicological endpoints observed in *Danio rerio*.**

(A) normal development of *Danio rerio* at 48 hpf observed in the negative control (RW), 0.01% Tween 80, 80% DMSO, and 20 μg/L PE-MBS. A. Embryo demonstrates eye bud (Eb), chorion (Ch), yolk (y), somites (s), and tail (t). 3 of the 4 toxicological endpoints denoting mortality: (B) lack of somite formation (*arrow*), (C) coagulation of eggs, and (D) non-detachment of tail (*arrow*) observed primarily in the positive control (5% ethanol), 200 μg/L PE-MBS, and 2000 μg/L PE-MBS.

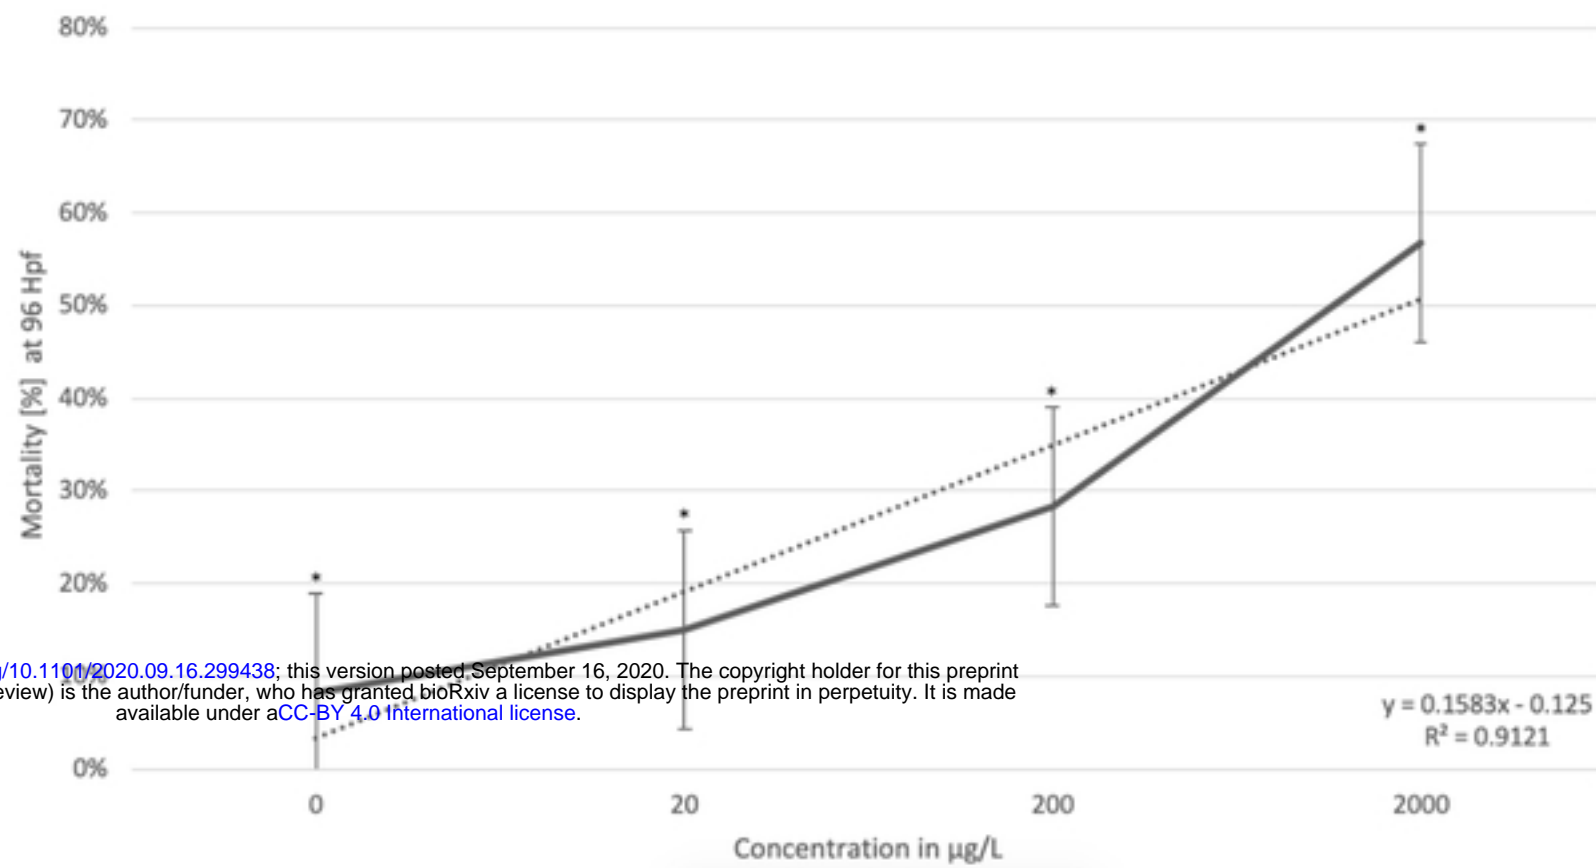

**Fig 4. Concentration-Mortality curve in FET of *Danio rerio* treated with PE-MBS at 96 hpf.**

Error bars indicate standard error. Single-asterisk indicates a statistically significant difference of cumulative mortality between *Danio rerio* at 96 hpf ( $p < 0.05$ ). (\*: $p < 0.05$ ).

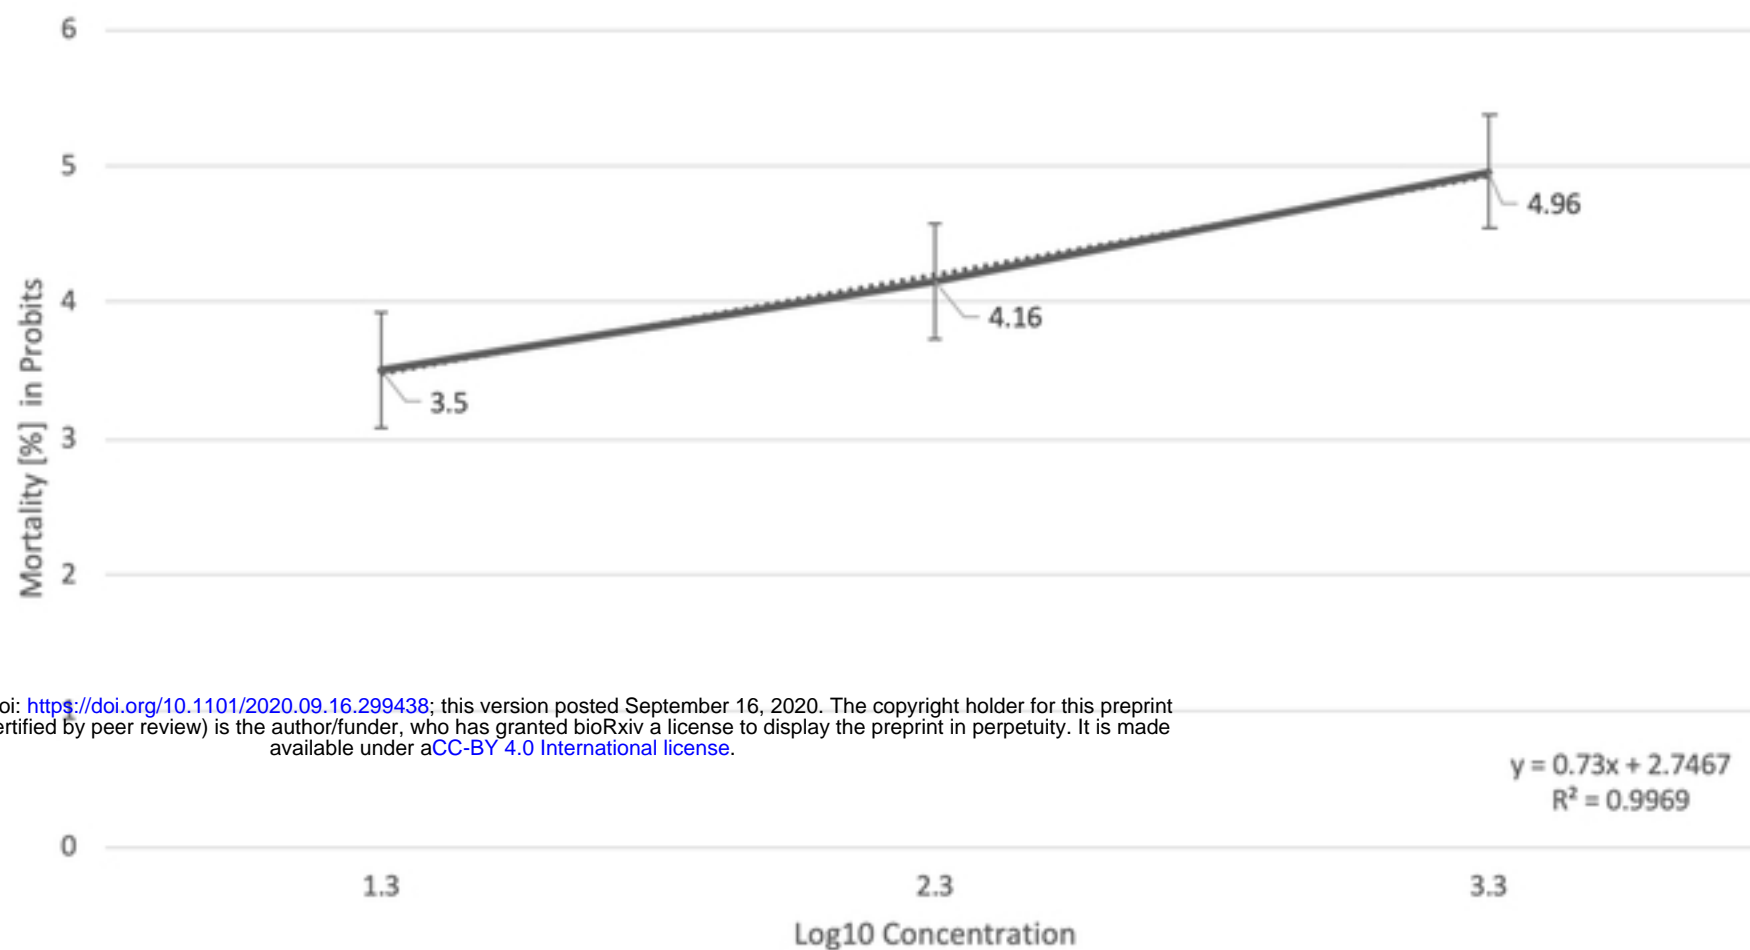

**Fig 5. Probit analysis for the estimation of LC<sub>50</sub> values of *Danio rerio* exposed to PE-MBS.** Analyzed results showed that the LC<sub>50</sub> is 2455.096 µg/L with 95% confidence limits. Error bars indicate standard error.

bioRxiv preprint doi: <https://doi.org/10.1101/2020.09.16.299438>; this version posted September 16, 2020. The copyright holder for this preprint (which was not certified by peer review) is the author/funder, who has granted bioRxiv a license to display the preprint in perpetuity. It is made available under aCC-BY 4.0 International license.

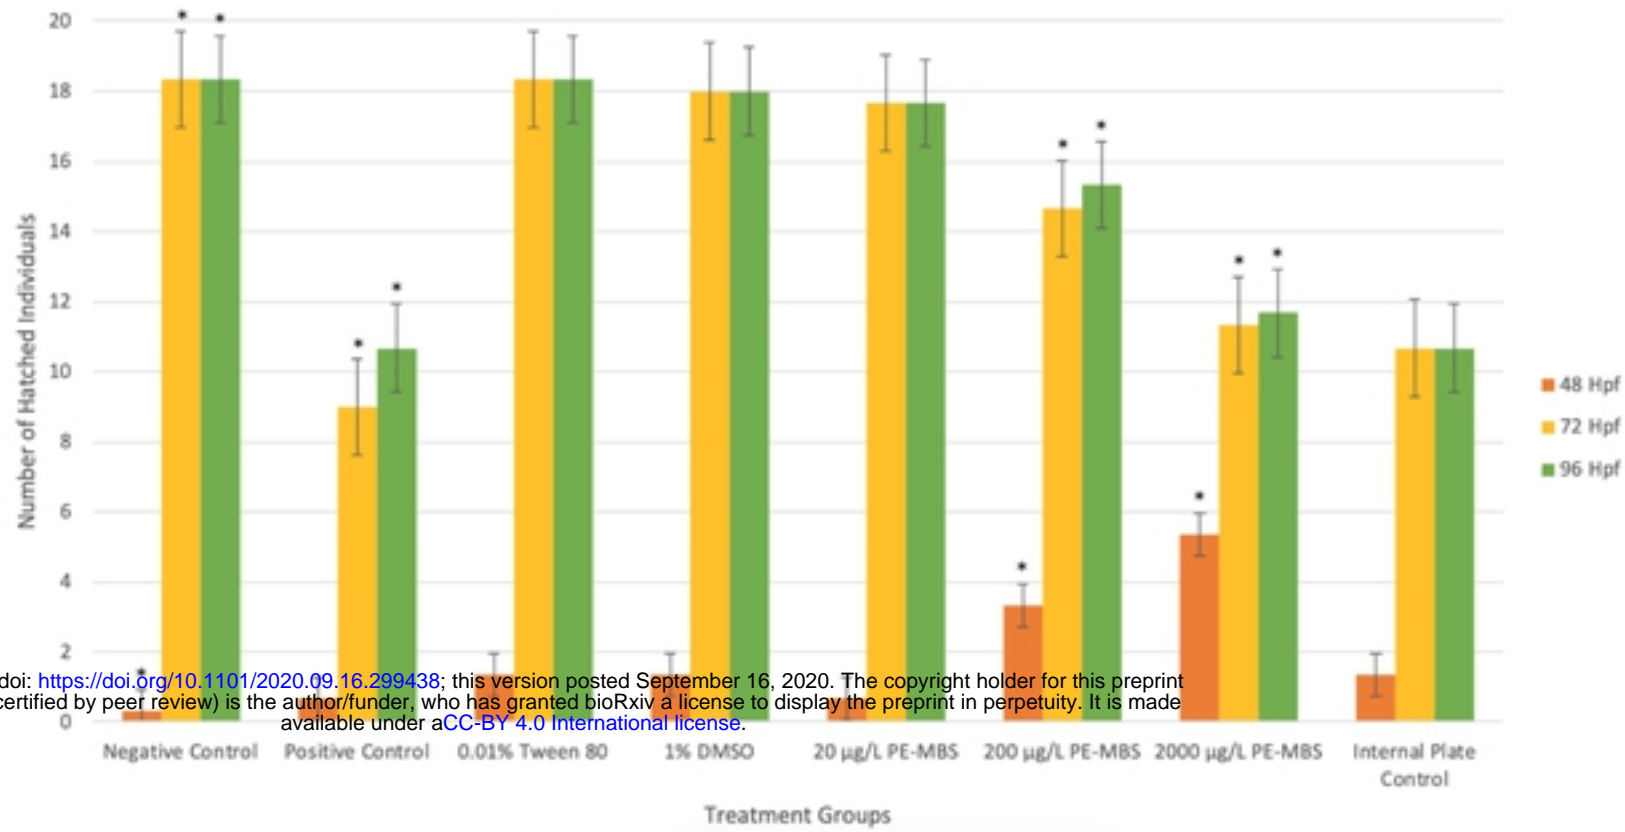

**Fig 6. Cumulative number of hatched *Danio rerio* within 96 hour exposure to different treatments.**

Data shown is based on the average of three replicates performed in the study. Error bars indicate standard error. Single-asterisk indicates a statistically significant difference of cumulative hatching between *Danio rerio* ( $p < 0.05$ ). (\*:  $p < 0.05$ ).

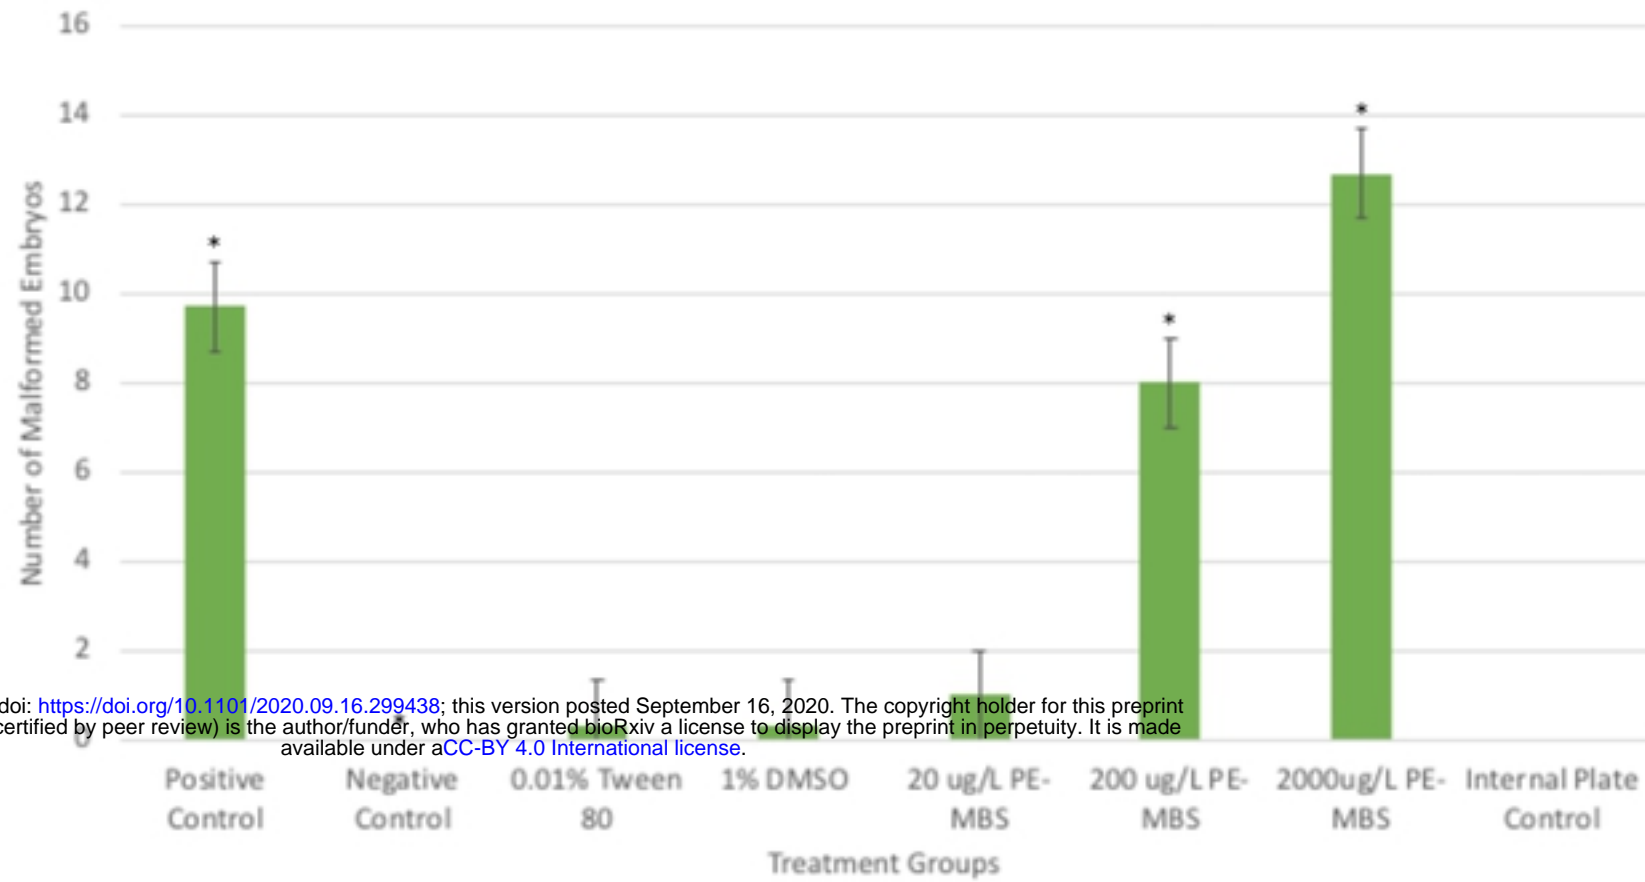

bioRxiv preprint doi: <https://doi.org/10.1101/2020.09.16.299438>; this version posted September 16, 2020. The copyright holder for this preprint (which was not certified by peer review) is the author/funder, who has granted bioRxiv a license to display the preprint in perpetuity. It is made available under aCC-BY 4.0 International license.

**Fig 7. Total number of malformations observed in *Danio rerio* for each treatment at 144 hpf.**

Error bars indicate standard error. Single-asterisk indicates a statistically significant difference of total number of malformations between *Danio rerio* at 144 hpf ( $p < 0.05$ ). (\*:  $p < 0.05$ ).

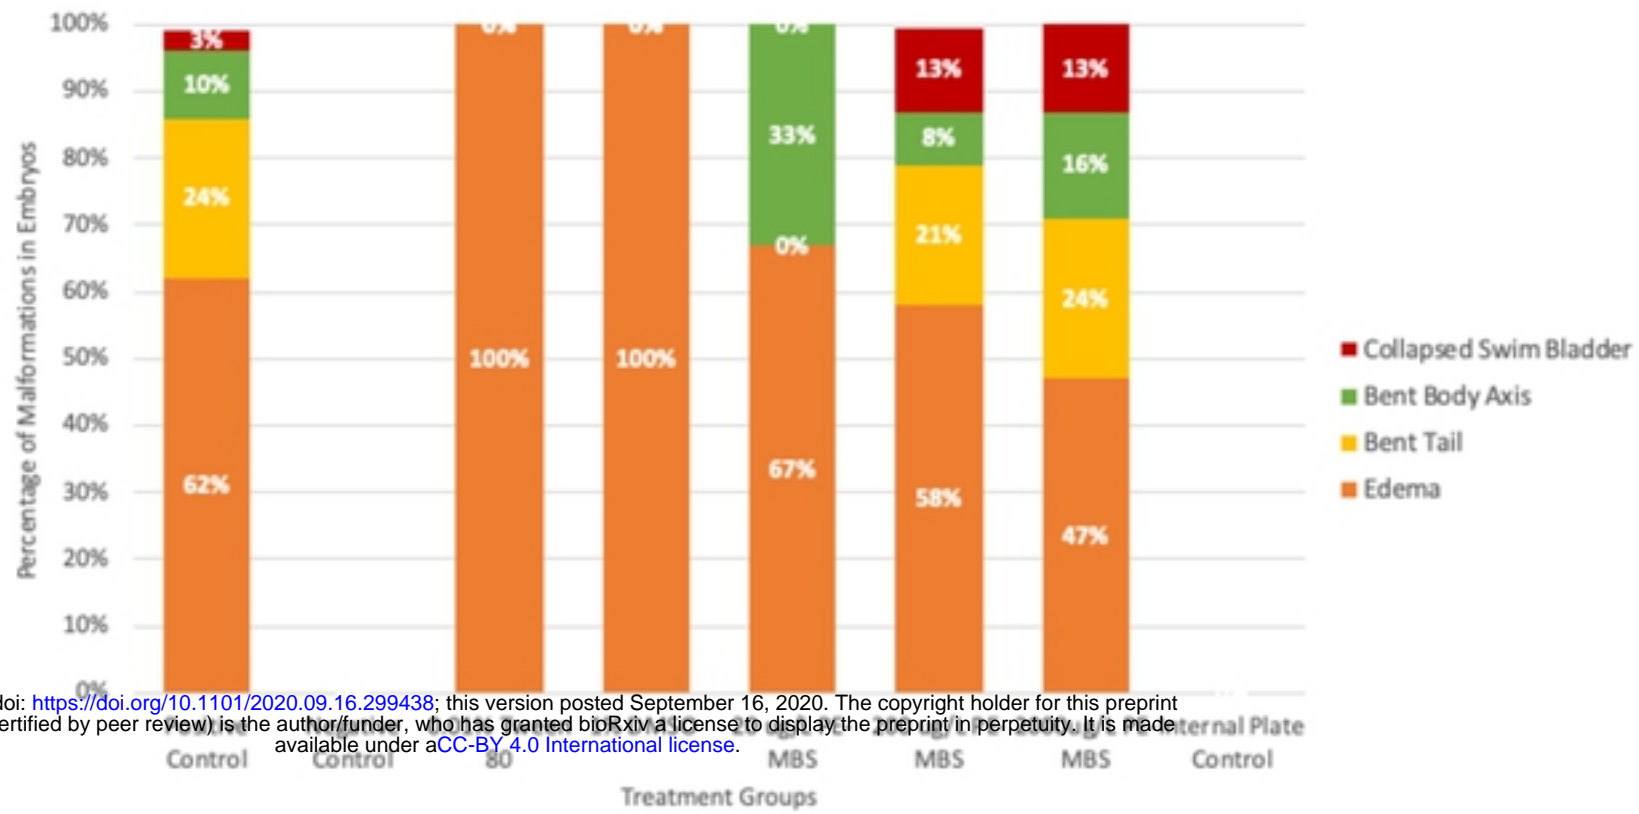

**Fig 8. Relative percentages of malformations observed in *Danio rerio* for each treatment at 144 hpf.** Percentage shown is based on the average of three replicates performed in the study.



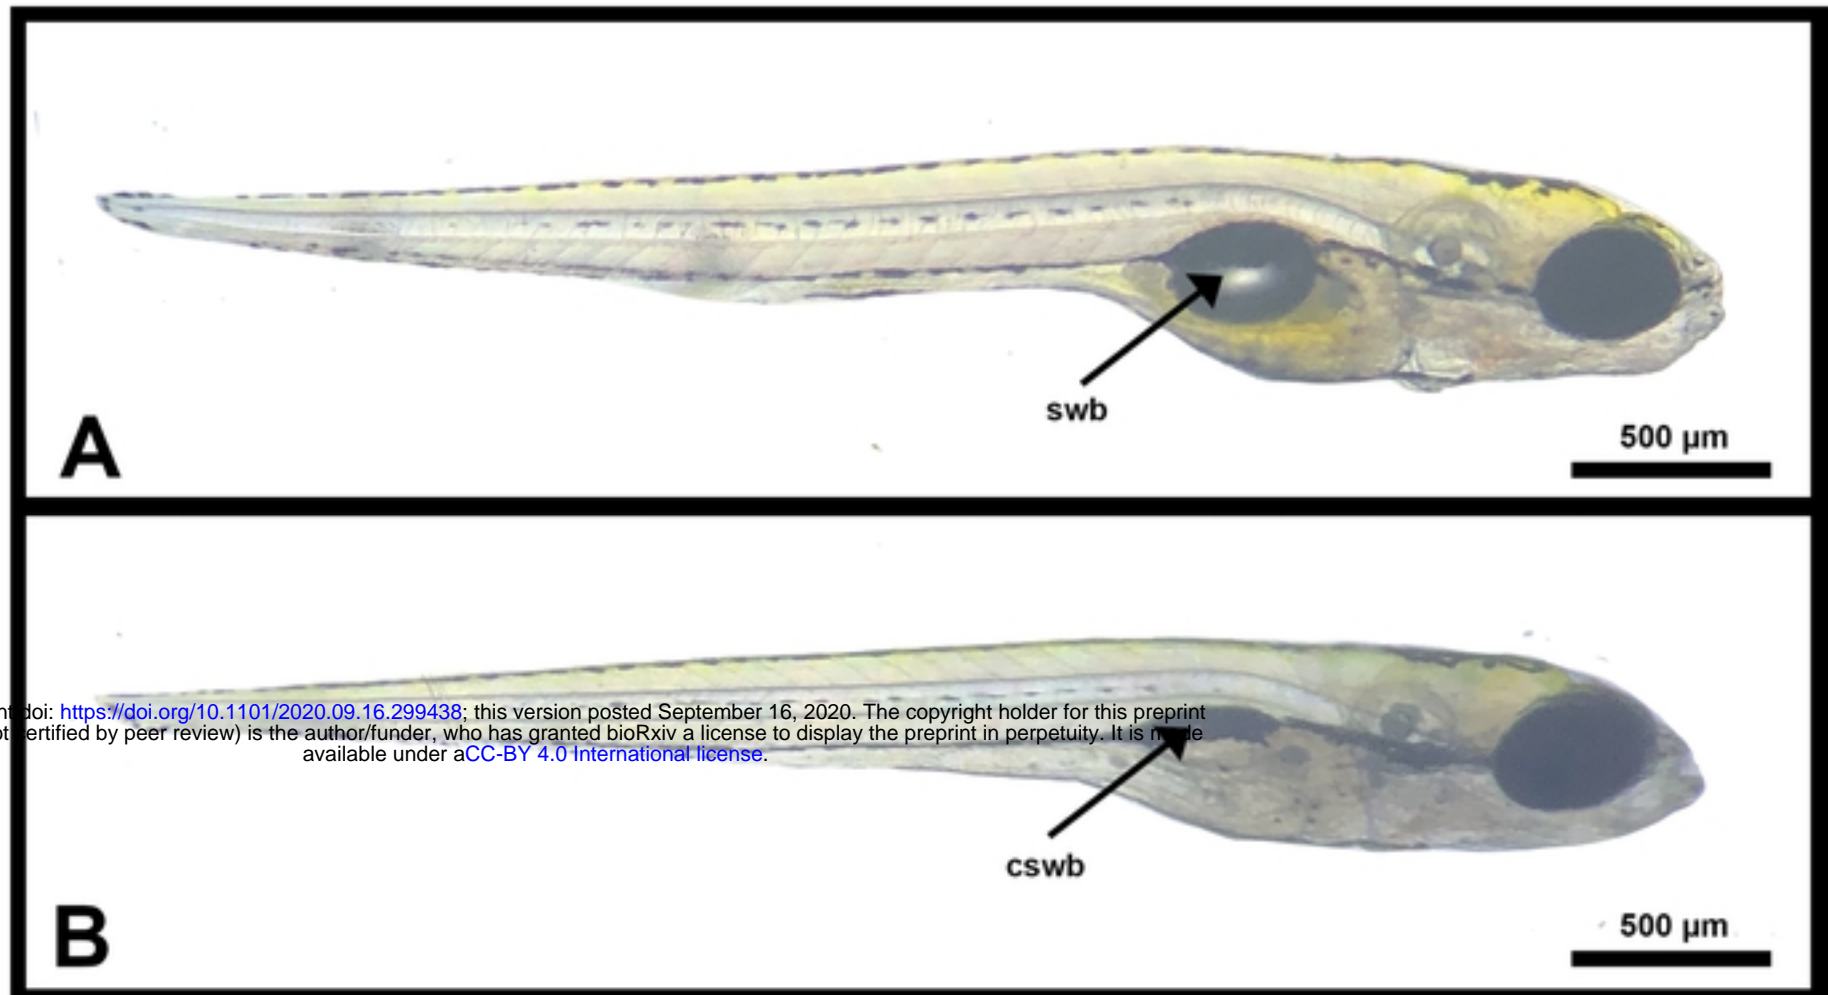

**Fig 9. Fresh mount of *Danio rerio* at 144 hpf showing collapse of the swim bladder.**

(A) shows normal development of the swim bladder (swb) observed in the negative control (RW), 0.01% Tween 80 % DMSO, and 20 µg/L PE-MBS. (B) shows collapsed swim bladder (cswb) observed in the following treatments of increasing order: the positive control (5% ethanol), 200 µg/L PE-MBS, and 2000 µg/L PE-MBS.

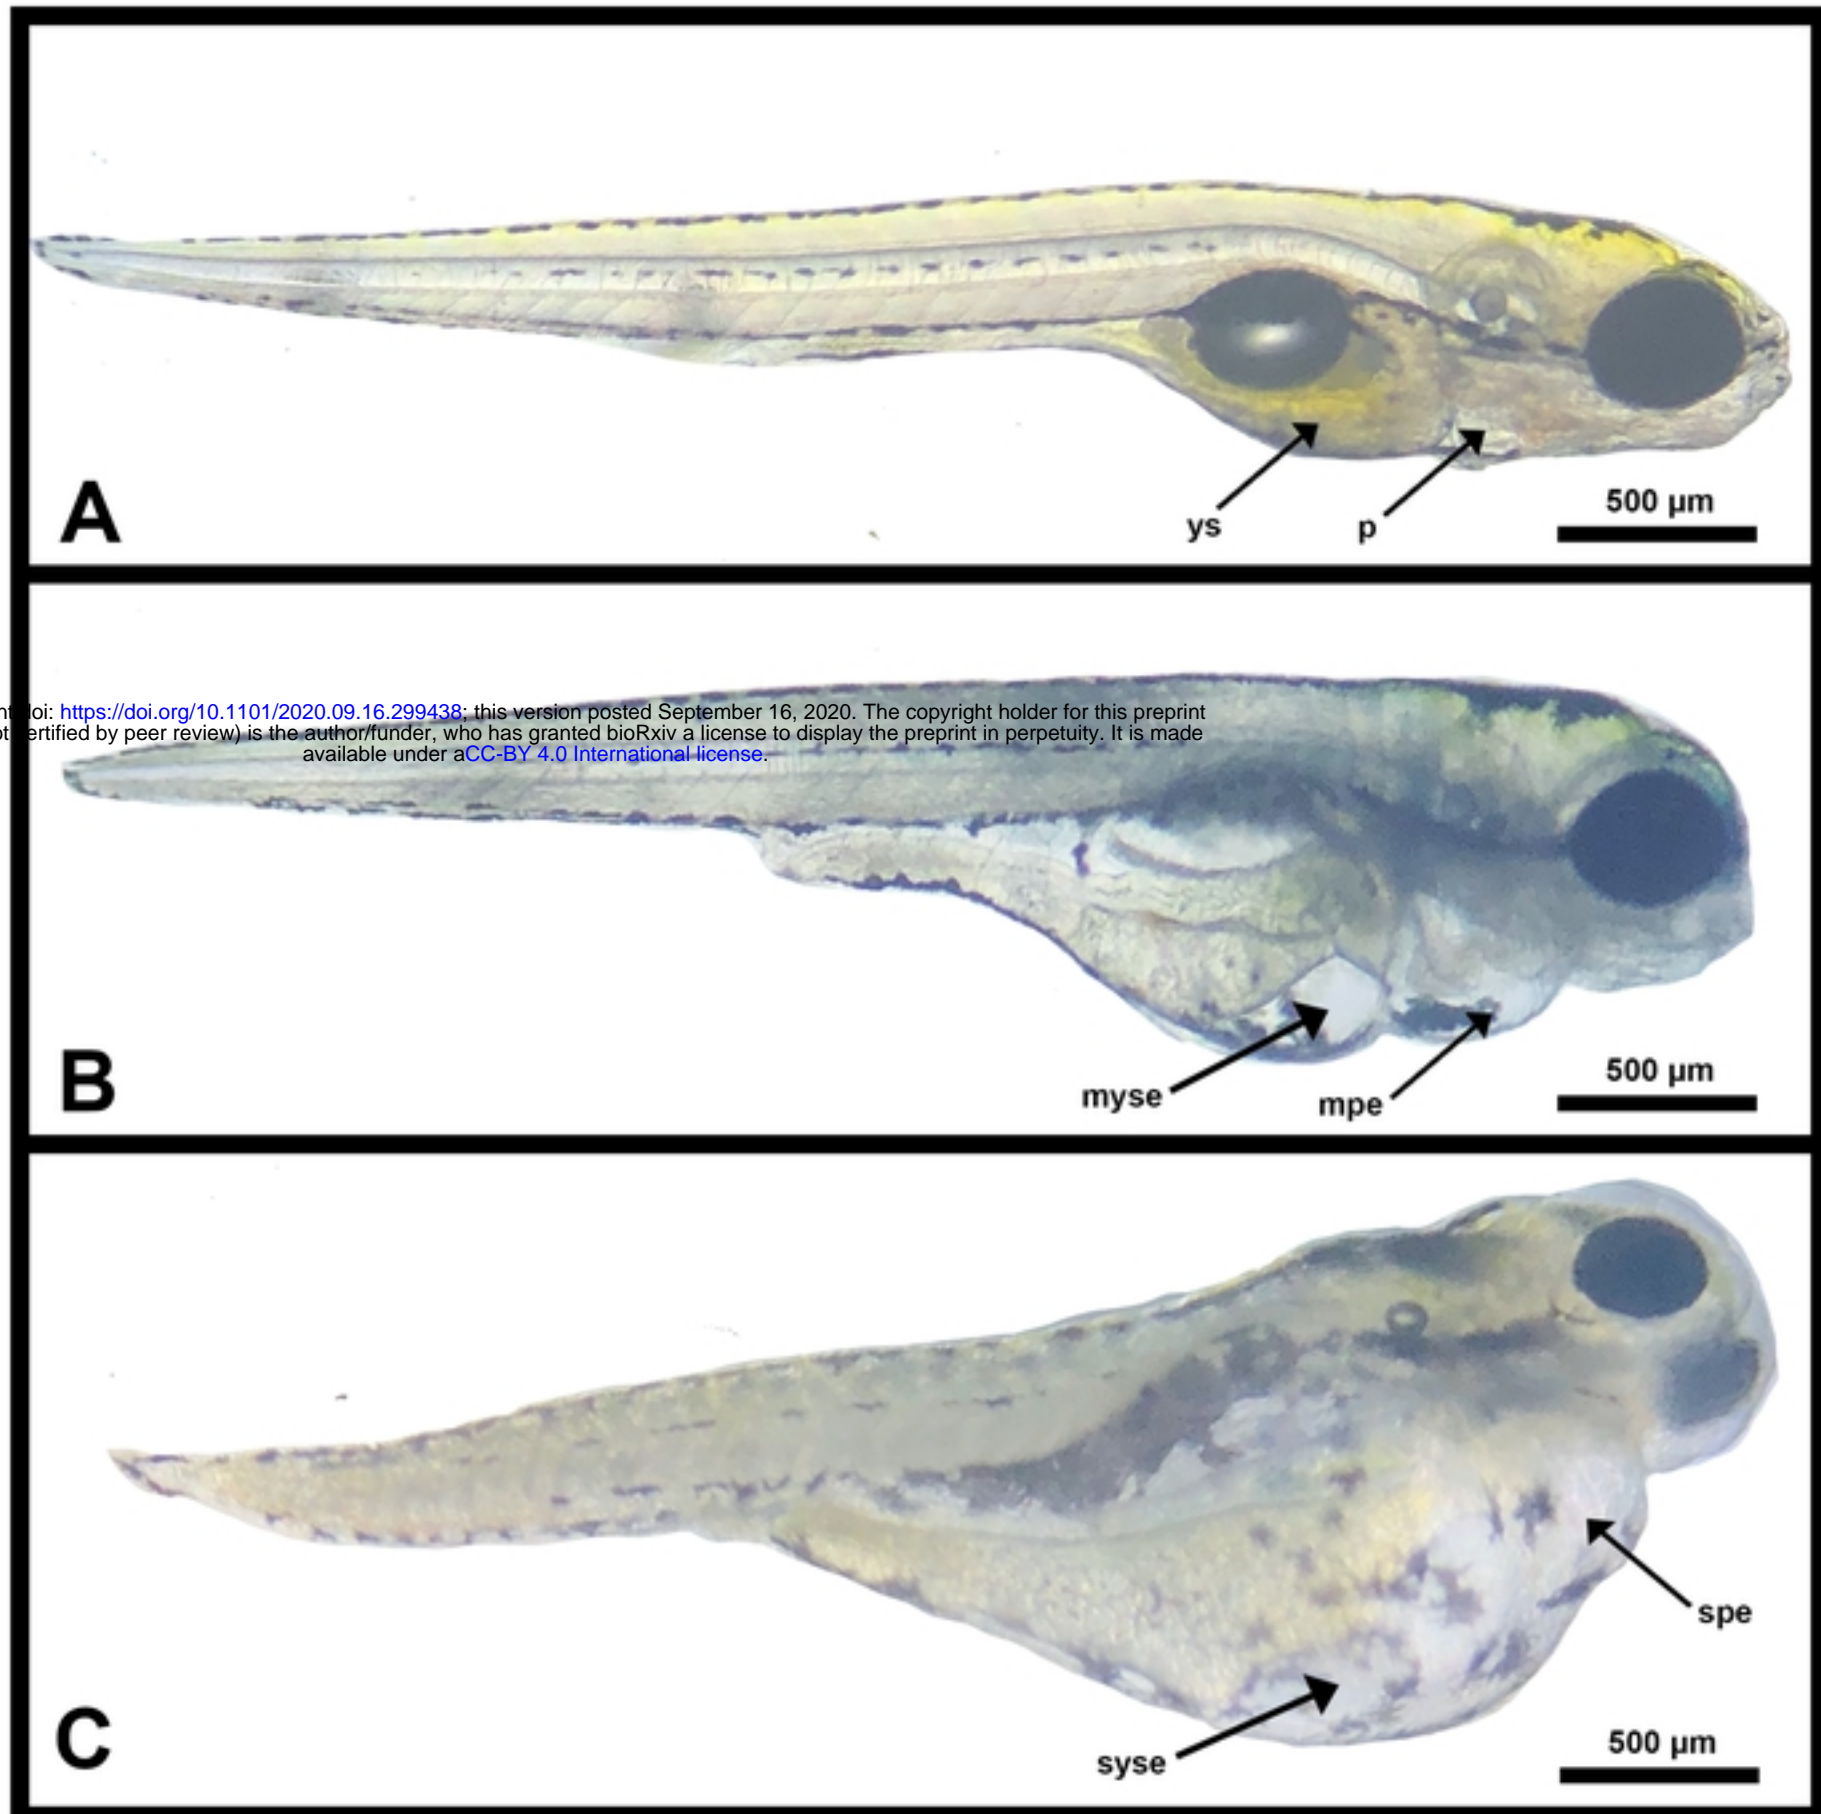

**Fig 10. Fresh mount of *Danio rerio* at 144 hpf with different severities of yolk sac and pericardial edema.**

(A) shows the normal development observed in the negative control (RW) with normal yolk sac (ys) and pericardium (p). (B) exhibits mild yolk sac edema (myse) observed in treatments 0.01% Tween 80 and 1% DMSO and mild pericardial edema (mpe). (C) shows severe yolk sac (syse) and pericardial edema (spe) both observed in 200µg/L PE-MBS, 2000µg/L PE-MBS, and 5% ethanol with the last two respective treatment and control groups exhibiting the most incidents of edema.

bioRxiv preprint doi: <https://doi.org/10.1101/2020.09.16.299436>; this version posted September 16, 2020. The copyright holder for this preprint (which was not certified by peer review) is the author/funder, who has granted bioRxiv a license to display the preprint in perpetuity. It is made available under aCC-BY 4.0 International license.

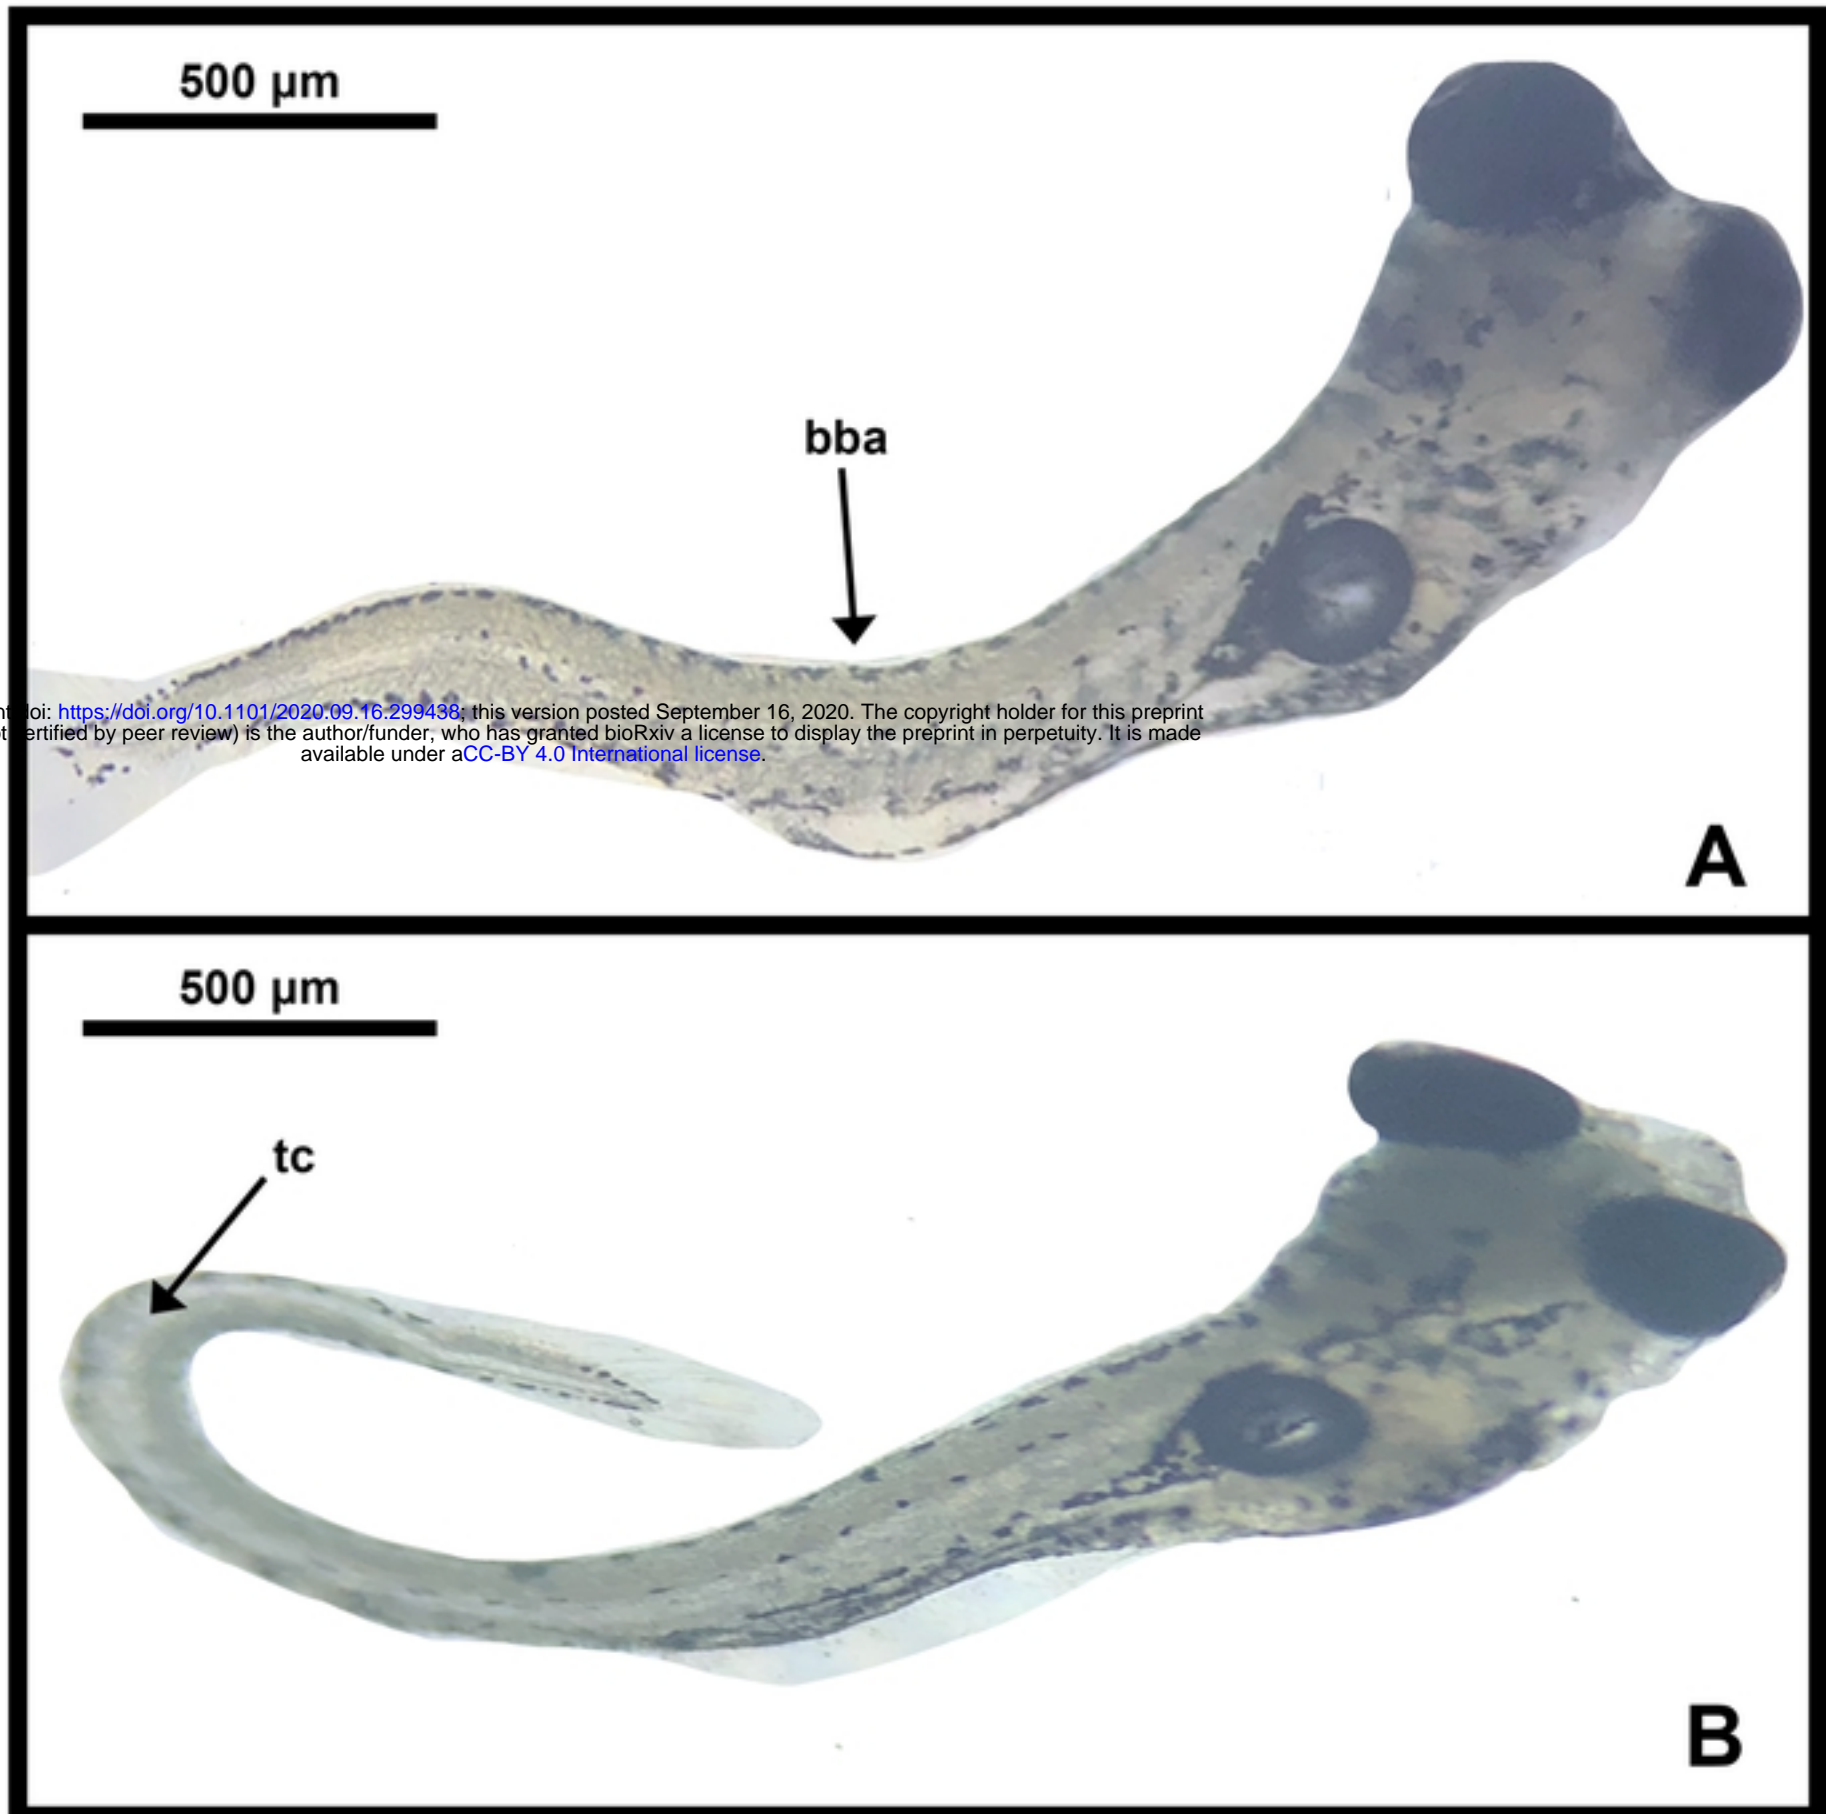

**Fig 11. Fresh mount of *Danio rerio* at 144 hpf showing bent body axis and tail curvature.** (A) exhibits bent body axis (bba). (B) exhibits tail curvature (tc). Both malformations were observed in the positive control (5% ethanol) and in treatments, 200 and 2000 µg/L PE-MBS. Bent body axis was observed in the 20 µg/L PE-MBS

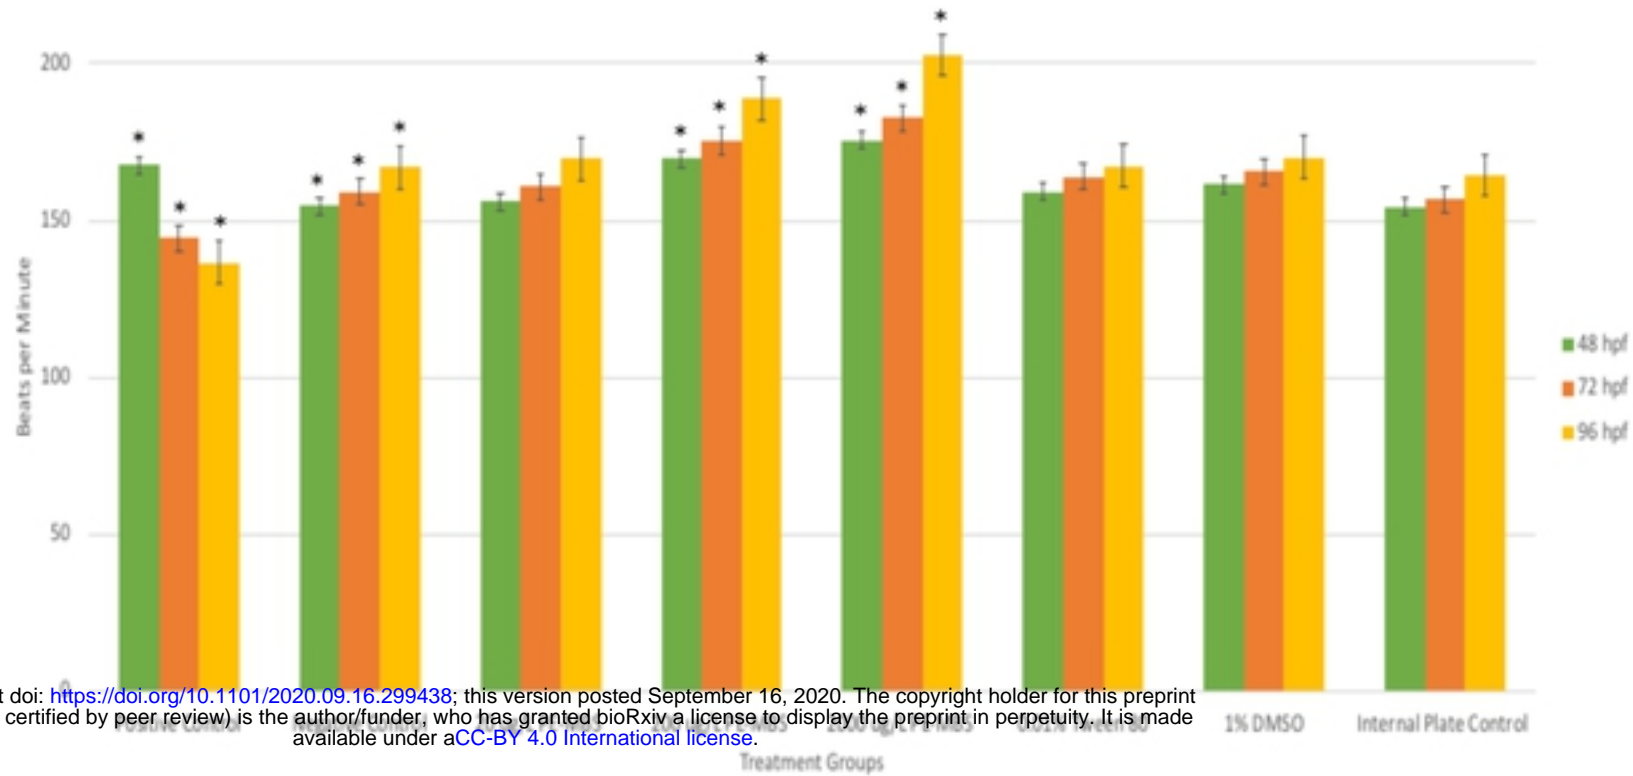

**S12 Fig. Heart rate (bpm) observed in *Danio rerio* for each treatment.**

Data shown is based on the average of three replicates performed in the study. Error bars indicate standard error. Single-asterisk indicates a statistically significant difference of heart rate between *Danio rerio* ( $p < 0.05$ ). (\*:  $p < 0.05$ ).
